# Supplementary material for: Responses of the Emiliania huxleyi Proteome to Ocean Acidification
Source: PLoS One. 2013 Apr 12;8(4):e61868. doi: 10.1371/journal.pone.0061868 (PMC3625171; doi:10.1371/journal.pone.0061868)
Supplement: Data S2 — Detailed information regarding proteins identified in the current study. (XLS) [file pone.0061868.s002.xls]

## Sheet: Key
Column	Description
1) Taxres search	All identifications made from taxonomically restricted UniProtKB database searches in the current study (quantified and non-quantified information)
Protein accession	UniProtKB accession used to make identification - first match in Mascot output given. Alternative hits are detailed in sheet (6) "taxres&taxres Mar Biotech 2011"
Protein description	Description of protein given in UniProtKB
Protein description (2)	Abbreviated description of protein
Gene	Gene designation in UniProtKB accession description
Protein mass (Da)	Predicted mass of protein in Daltons (Da)
Protein pI	Predicted isoelectric point (pI) of protein identification
No. peps	Number of peptides generated by MS/MS analysis that match to this accession
iTRAQ?	"Y" is given if an identification has ≥2 peptides with iTRAQ quantification
Mar Biotechnol (2011)?	Is the ID found in Jones et al (2011) Marine Biotechnology 13:496-504 ?
Strain?	If ID was present in Jones et al (2011), what strains did the identification come from?
2) BUDAPEST output	All identifications made from ESTs using the BUDAPEST pipeline in the current study (quantified AND non-quantified information)
Hit (RF)	Accession of EST matching to peptides generated by MS/MS analysis and correct reading frame (RF) translation
Consensus	Consensus sequence of ESTs generated by EST analysis using the BUDAPEST pipeline
iTRAQ?	"Y" is given if an identification has ≥2 peptides with iTRAQ quantification
Description	Description/identification of the EST consensus sequence given by BUDAPEST
Manual ID	Identification given to consensus sequence after inspection of sequence within a phylogenetic context and BLASTP, Pfam and NCBI Conserved Domain Database analysis
Pfam HMM accession	Accession numner of any Pfam HMM identification found within the consensus sequence (e <10-4)
Pfam HMM domain	Name of Pfam HMM identification
Type	Type of Pfam HMM identification (domain or family)
Pfam clan	Pfam clan and active sites found within the consensus sequence
Clan description	Description of Pfam clan from Pfam database
Additional notes:	Gold indicates that no identification could be made for consensus sequence
3) JGI genome output	All identifications made against the Emiliania huxleyi CCMP1516 version 1 draft genome
Model protein ID	Protein ID number within Emiliania huxleyi (CCMP1516) genome model proceeded by "EHUXJGI" for our database identification purposes
Name	Name of protein ID
Protein description	Description of protein identified
Protein mass (Da)	Predicted mass of protein in Daltons (Da)
No. peps	Number of peptides used to make identification
iTRAQ?	"Y" is given if an identification has ≥2 peptides with iTRAQ quantification
4) Quantified IDs	All quantified identifications from the current study; green highlighting indicates down-regulation under high CO2
Taxres search table
Protein accession	UniProtKB accession used to make identification
Protein description	Description of protein given in UniProtKB
Protein mass (Da)	Predicted mass of protein in Daltons (Da)
Protein pI	Predicted isoelectric point (pI) of protein identification
No. peps	Number of peptides generated by MS/MS analysis that match to this accession
No. iTRAQ peps	Number of peptides generated by MS/MS analysis that have iTRAQ reporter ion quantification
No. good iTRAQ peps	Number of peptides generated by MS/MS analysis that are likely to have valid iTRAQ reporter ion quantification
114:113	Ratio of iTRAQ tag 114:113. This is ratio of protein abundance from high:low CO2 conditions under the first CO2 incubation
116:115	Ratio of iTRAQ tag 116:115. This is ratio of protein abundance from high:low CO2 conditions under the second CO2 incubation
118:117	Ratio of iTRAQ tag 118:117. This is ratio of protein abundance from high:low CO2 conditions under the third CO2 incubation
CI	Confidence interval (alpha = 0.05) indicating variance of the ratios 114:113, 116:115 and 118:117
GM	Geometric mean of the ratios 114:113, 116:115 and 118:117
GM-CI	Geometric mean minus confidence
GM+CI	Geometric mean plus confidence
BUDAPEST results table
ESTs making ID*	Accession of EST matching to peptides generated by MS/MS analysis that was used to make BUDAPEST consensus. Number in parentheses represents the number of "good" peptides matching this EST after BUDAPEST analysis
Protein description	Manual protein description assigned to consensus sequence after BUDAPEST analysis; consensus sequence generated in parentheses
EST strain	Strain used to make EST library
n/2n	Represents whether the library was haploid (n) or diploid (2n)
No. of EST iTRAQ peps	Number of "good" BUDAPEST peptides (in parentheses in "ESTs making ID" column) that have iTRAQ reporter ion quantificiation
No. good iTRAQ peps	Number of "good" BUDAPEST peptides (in parentheses in "ESTs making ID" column) that are likely to have valid iTRAQ reporter ion quantificiation
RF	Reading frame (RF) that EST was translated into to make BUDAPEST consensus sequence
114:113	Ratio of iTRAQ tag 114:113. This is ratio of protein abundance from high:low CO2 conditions under the first CO2 incubation
116:115	Ratio of iTRAQ tag 116:115. This is ratio of protein abundance from high:low CO2 conditions under the second CO2 incubation
118:117	Ratio of iTRAQ tag 118:117. This is ratio of protein abundance from high:low CO2 conditions under the third CO2 incubation
CI	Confidence interval (alpha = 0.05) indicating variance of the ratios 114:113, 116:115 and 118:117
GM	Geometric mean of the ratios 114:113, 116:115 and 118:117
GM-CI	Geometric mean minus confidence
GM+CI	Geometric mean plus confidence
Genome results
Protein ID	Protein ID number within E. huxleyi genome model that was used to make identification
Protein description	Description of protein given in UniProtKB
Protein mass (Da)	Predicted mass of protein in Daltons (Da)
No. peps	Number of peptides generated by MS/MS analysis that match to this accession
No. iTRAQ peps	Number of peptides generated by MS/MS analysis that have iTRAQ reporter ion quantification
No. good iTRAQ peps	Number of peptides generated by MS/MS analysis that are likely to have valid iTRAQ reporter ion quantification
114:113	Ratio of iTRAQ tag 114:113. This is ratio of protein abundance from high:low CO2 conditions under the first CO2 incubation
116:115	Ratio of iTRAQ tag 116:115. This is ratio of protein abundance from high:low CO2 conditions under the second CO2 incubation
118:117	Ratio of iTRAQ tag 118:117. This is ratio of protein abundance from high:low CO2 conditions under the third CO2 incubation
CI	Confidence interval (alpha = 0.05) indicating variance of the ratios 114:113, 116:115 and 118:117
GM	Geometric mean of the ratios 114:113, 116:115 and 118:117
GM-CI	Geometric mean minus confidence
GM+CI	Geometric mean plus confidence
5) BUDAPEST,taxres and JGI combined	All identifications made from the current study (quantified and non-quantified); JGI refers to E. huxleyi genome results
Protein identification	Protein identification form the current study
Gene name(s) in UniProtKB	Name of gene (if ID made from UniProtKB and taxonomically restricted database search)
Accessions (UniProtKB)	Accession if ID made from UniProtKB
Consensus sequence (EST)	Consensus sequence of identification obtained from BUDAPEST analysis of EST matches
Additional notes:	Identifications in black are made from ESTs
	Identifications in red have been made from searches against the taxonomically restricted database only
	Identifications in blue have been made from the E. huxleyi draft genome only
	Identifications are in green and with a star if they are present in all three databases (genome, taxonomically restricted database and EST)
	Combination by nomenclature/clusters
6) Pfam BUDAPEST	Detailed Pfam results from analysis of unknown proteins (columns F-J of BUDAPEST output spreadsheet)
Sequence ID	Consensus sequence analysed
Alignment start	Start of alignment (amino acid residue)
Alignment end	End of alignment (amino acid residue)
Envelope start	Start of envelop match (amino acid residue)
Envelope end	End of envelop match (amino acid residue)
Hmm accession/Hmm name/Type	Pfam HMM accession/name/type
Hmm start	Start of HMM match (amino acid residue)
Hmm end	End of HMM match (amino acid residue)
Hmm length	Length of HMM match
Bit score	Score of match
Evalue	E-value of consensus sequence alignment against Pfam accession
Significance	Significance of Pfam identification: 1 indicates significance, 0 is non-significant. Significance defined as e <10-4)
Clan/predicted active site residues	Pfam clan with predicted active site residues given (if any present)
Additional notes:	Pfam information considered only if threshold e ≤ 0.0001 (highlighted in green)
	If cells are highlighted in red, results have not been considered since e is too high
7) Taxres&taxres Mar Biotech 2011	Combination of identifications made from taxonomically restricted database searches of the current paper and Jones et al (2011) Marine Biotechnology 13:496-504
Gene name(s) in UniProtKB	Name of gene within the UniProtKB database
Accessions (CO2)	UniProtKB identifications made within the current paper (both quantified and non-quantified identifications)
Accessions (Mar Biotechnol 2011)	UniProtKB identifications made within Jones et al (2011) Marine Biotechnology 13:496-504
Additional notes:	Red text indicates ID came from iTRAQ (CO2) current paper
	Black text indicates ID came from Mar Biotechnol (2011)
	Green text and star indicates ID comes from both datasets. If two stars are present, this indicates exact redundancy (i.e. accession number) between two datasets
	Bold accession indicates that the database accession originated from Emiliania huxleyi
	All IDs are based on ≥2 peptides
	Peptide numbers for CO2 experiment IDs (current study) can be found in "Taxres search" worksheet (1)
	Peptide numbers for IDs from Jones et al (2011) Mar Biotechnol paper can be found in supplementary information available at: http://www.springerlink.com/content/f4v1625212384460/10126_2010_Article_9320_ESM.html
8) CO2 ESTs&EST Mar Biotech 2011	Combination of identifications made from BUDAPEST enabled EST searches of the current paper and Jones et al (2011) Marine Biotechnology 13:496-504
Protein description	Description of consensus sequence (protein identification)
BUDAPEST cluster (CO2)	EST consensus sequence identifications made within the current paper (both quantified and non-quantified identifications)
BUDAPEST cluster (Mar Biotechnol 2011)	EST consensus sequence identifications made within Jones et al (2011) Marine Biotechnology 13:496-504
	EHUX(xxx) refers to strain NZEH
	E371HUX(xxx) refers to strain CCMP371
	E1516HUX(xxx) refers to strain CCMP1516
Additional notes:	All IDs are based on ≥2 peptides.
	Peptide numbers for CO2 experiment EST IDs can be found in "BUDAPEST output" worksheet (2)
	Peptide numbers for EST IDs from Jones et al (2011) Mar Biotechnol paper can be found in supplementary information available at: http://www.springerlink.com/content/f4v1625212384460/10126_2010_Article_9320_ESM.html
	Redundancy between the two datasets has been determined by nomenclature and cluster analysis
	Red text indicates ID came from iTRAQ (CO2) current paper
	Black text indicates ID came from Mar Biotechnol (2011)
	Green text and star indicates ID comes from both datasets
9) All CO2 and Mar Bio proteins	Combination of all identifications from the current paper and Jones et al (2011) Marine Biotechnology 13:496-504
Protein identification	Description of protein identified
CO2 identifier	UniProtKB accession number, E. huxleyi protein ID number (genome) or EST consensus sequence number of identification from the current paper (both quantified and non-quantified)
Mar Bio (2011) identifier	UniProtKB accession number or EST consensus sequence number of identification from Jones et al (2011) Marine Biotechnology 13:496-504
Additional notes:	Red text indicates ID came from current CO2 paper
	Black text indicates ID came form Mar Biotechnol (2011)
	Green text and start indicates ID came from both datasets
	A combination of nomenclature and direct homology was used to create this list
10) UniProtKB MASCOT	Raw MASCOT output from search of data against taxonomically restricted UniProtKB dataset
11) JGI Ehux MASCOT	Raw MASCOT output from search of data against Emiliania huxleyi CCMP1516 JGI genome
12) EST MASCOT	Raw MASCOT output from search of data against ~130,000 Emiliania huxleyi ESTs - input data for the BUDAPEST pipeline

## Sheet: Taxres search
Protein accession ^	Protein description	Protein description (2)	Gene	Protein mass (Da)	Protein pI	No. peps	iTRAQ?	Mar Biotechnol (2011)?	Strain?
C1MUM2_MICPS__C1MUM2	RecName: Full=Histone H4;	Histone H4		14735	11.48	8	Y
ATPB_EMIHU__Q4G3C8	RecName: Full=ATP synthase subunit beta, chloroplastic; EC=3.6.3.14; AltName: Full=ATP synthase F1 sector subunit beta; AltName: Full=F-ATPase subunit beta;	ATP synthase F(1) sector subunit beta (chloroplastic)	atpB	57520	4.74	10	Y	Y	NZEH/1516
Q5ENR8_ISOGA__Q5ENR8	RecName: Full=Phosphoglycerate kinase; EC=2.7.2.3;	Phosphoglycerate kinase		57177	5.04	4	Y	Y	NZEH
ATPA_EMIHU__Q4G397	RecName: Full=ATP synthase subunit alpha, chloroplastic; EC=3.6.3.14; AltName: Full=ATP synthase F1 sector subunit alpha; AltName: Full=F-ATPase subunit alpha;	ATP synthase F(1) sector subunit alpha (chloroplastic)	atpA	61395	4.98	8	Y	Y	NZEH/1516
ATPX_EMIHU__Q4G3A0	RecName: Full=ATP synthase subunit b~, chloroplastic; AltName: Full=ATP synthase F(0) sector subunit b~; AltName: Full=ATPase subunit II;	ATP synthase F(0) sector subunit b' (chloroplastic)	atpG	22375	4.81	4	Y	Y	NZEH
C7BEK1_PEDMN__C7BEK1	RecName: Full=ATP synthase subunit alpha, chloroplastic; EC=3.6.3.14; AltName: Full=ATP synthase F(0) sector subunit b~; AltName: Full=F-ATPase subunit alpha;	ATP synthase F(1) sector subunit alpha (chloroplastic)	atpA	61371	6.51	4	Y
RBL_EMIHU__Q4G3F4	RecName: Full=Ribulose bisphosphate carboxylase large chain; Short=RuBisCO large subunit; EC=4.1.1.39;	Ribulose bisphosphate carboxylase large chain	rbcL	61608	5.86	9	Y	Y	NZEH/1516/371
ATPE_EMIHU__Q4G3C9	RecName: Full=ATP synthase epsilon chain, chloroplastic; AltName: Full=ATP synthase F1 sector epsilon subunit; AltName: Full=F-ATPase epsilon subunit;	ATP synthase F(1) sector subunit epsilon (chloroplastic)	atpE	16718	4.77	2
Q4G3D0_EMIHU__Q4G3D0	SubName: Full=Clp protease ATP binding subunit;	Clp protease ATP binding protein	clpC	105529	5.46	4	Y	Y	1516/371
D0VMV8_VOLCA__D0VMV8	SubName: Full=Ribosomal protein L14;	Ribosomal protein L14 (chloroplastic)	rpl14	15933	10.26	2
B8BY55_THAPS__B8BY55	RecName: Full=S-adenosylmethionine synthase; EC=2.5.1.6;	S-adenosylmethionine synthetase	AMS1	61480	5.19	2
Q2IA80_ISOGA__Q2IA80	SubName: Full=Chloroplast O-acetyl-serine lyase; Flags: Fragment;	Chloroplast O-acetyl serine lyase		50200	7.68	3		Y	NZEH
C7BEX8_CHLKE__C7BEX8	RecName: Full=50S ribosomal protein L14, chloroplastic;	50S ribosomal protein L14 (chloroplastic)	rpl14	15882	10.87	2
CYF_EMIHU__Q4G3D7	RecName: Full=Apocytochrome f; Flags: Precursor;	Apocytochrome f	petA	41059	9.18	3	Y
Q2IA54_KARMI__Q2IA54	SubName: Full=Chloroplast glyceraldehyde-3-phosphate dehydrogenase;	Glyceraldehyde-3-phosphate dehydrogenase (chloroplastic)		53849	5.53	4		Y	NZEH
Q33482_GELLA__Q33482	RecName: Full=Ribulose bisphosphate carboxylase large chain; Short=RuBisCO large subunit; EC=4.1.1.39;	Ribulose bisphosphate carboxylase large chain	rbcL	62288	5.77	7
A7UM67_GRIMO__A7UM67	SubName: Full=Ribulose-1,5-bisphosphate carboxylase/oxygenase large subunit; EC=4.1.1.39;	Ribulose bisphosphate carboxylase large chain	rbcL	61693	6.05	4
A8IVJ3_CHLRE__A8IVJ3	SubName: Full=Phospholipid-transporting ATPase; Flags: Fragment;	Phospholipid-transporting ATPase	ALA1	146600	5.89	2
Q4G3F3_EMIHU__Q4G3F3	SubName: Full=Ribulose 1,5-bisphosphate carboxylase/oxygenase small subunit;	Ribulose bisphosphate carboxylase small chain	rbcS	19288	5.85	4		Y	NZEH/371
D0MWJ7_PHYIN__D0MWJ7	RecName: Full=Histone H2A;	Histone H2A		19427	11.1	4	Y
B7G1C9_PHATR__B7G1C9	SubName: Full=Predicted protein;	Predicted protein 1		256704	5.72	4
Q00Z00_OSTTA__Q00Z00	SubName: Full=Chromosome 11 contig 1, DNA sequence;	Predicted protein 2		105893	9.68	2
Q00Y53_OSTTA__Q00Y53	RecName: Full=Histone H2B;	Histone H2B		21130	10.23	2
RR7_EMIHU__Q4G343	RecName: Full=30S ribosomal protein S7, chloroplastic;	30S ribosomal protein S7 (chloroplastic)	rps7	22404	10.54	2	Y	Y	NZEH
Q6WEV8_ISOGA__Q6WEV8	SubName: Full=Glyceraldehyde-3-phosphate dehydrogenase; Flags: Fragment;	Glyceraldehyde-3-phosphate dehydrogenase	GAPDH	42506	6.11	2
^ first match in Mascot given

## Sheet: BUDAPEST output
All BUDAPEST identifications including functional annotation of unknown proteins					Identifications for all unknown/predicted/putative/uncharacterised proteins (column D)
Hit (RF)	Consensus	iTRAQ?	Description	Manual ID	Pfam HMM accession	Pfam HMM domain	Type	Pfam clan	Clan description
gi|37697421_RF3	EHUX130k01a		Similar (e=4.00e-40) to Q5CRJ4_CRYPV__Q5CRJ4 SubName: Full=Polyubiquitin with 3 Ub domains; Flags: Fragment;	Ubiquitin family protein
gi|208412793_RF1	EHUX130k01b		Similar (e=1.00e-164) to D0NTZ3_PHYIN__D0NTZ3 SubName: Full=Ubiquitin family protein, putative;	Ubiquitin family protein
gi|261420959_RF2	EHUX130k01b		Similar (e=1.00e-164) to D0NTZ3_PHYIN__D0NTZ3 SubName: Full=Ubiquitin family protein, putative;	Ubiquitin family protein
gi|37697421_RF1	EHUX130k01c		Similar (e=9.00e-38) to D0NXH1_PHYIN__D0NXH1 SubName: Full=Ubiquitin, putative;	Ubiquitin family protein
gi|37697421_RF2	EHUX130k01d		Similar (e=9.00e-33) to Q00Y36_OSTTA__Q00Y36 SubName: Full=Polyubiquitin (ISS);	Ubiquitin family protein
gi|58184644_RF-3	EHUX130k01e		Similar (e=5.00e-32) to Q5CRJ4_CRYPV__Q5CRJ4 SubName: Full=Polyubiquitin with 3 Ub domains; Flags: Fragment;	Ubiquitin family protein
gi|261441602_RF3	EHUX130k01f	Y	Similar (e=8.00e-75) to C1N647_MICPS__C1N647 SubName: Full=Predicted protein;	Ubiquitin family protein (putative)	PF00240.17/PF09055.5	Ubiquitin/Sod_Ni	Domain/Domain	CL0072	Ubiquitin superfamily
gi|208411055_RF2	EHUX130k02a		No BLAST hit (e<1.00e-04) to EHux_TaxaDB-THAPS.fas	Predicted protein	PF06549.6	DUF1118	Family	No_clan
gi|208405580_RF-2	EHUX130k03a		No BLAST hit (e<1.00e-04) to EHux_TaxaDB-THAPS.fas	No BLAST hit
gi|208412524_RF-2	EHUX130k03a		No BLAST hit (e<1.00e-04) to EHux_TaxaDB-THAPS.fas
gi|208620829_RF-2	EHUX130k03a		No BLAST hit (e<1.00e-04) to EHux_TaxaDB-THAPS.fas
gi|208411256_RF1	EHUX130k04a		Similar (e=1.00e-180) to Q2IA55_KARMI__Q2IA55 SubName: Full=Chloroplast glyceraldehyde-3-phosphate dehydrogenase; Flags: Fragment;	Glyceraldehyde-3-phosphate dehydrogenase (chloroplastic)
gi|208423550_RF2	EHUX130k04a		Similar (e=1.00e-180) to Q2IA55_KARMI__Q2IA55 SubName: Full=Chloroplast glyceraldehyde-3-phosphate dehydrogenase; Flags: Fragment;
gi|208424052_RF-2	EHUX130k04a		Similar (e=1.00e-180) to Q2IA55_KARMI__Q2IA55 SubName: Full=Chloroplast glyceraldehyde-3-phosphate dehydrogenase; Flags: Fragment;
gi|208405580_RF2	EHUX130k05a		No BLAST hit (e<1.00e-04) to EHux_TaxaDB-THAPS.fas	No BLAST hit
gi|208412524_RF1	EHUX130k05a		No BLAST hit (e<1.00e-04) to EHux_TaxaDB-THAPS.fas
gi|208620829_RF2	EHUX130k05a		No BLAST hit (e<1.00e-04) to EHux_TaxaDB-THAPS.fas
gi|208407130_RF-2	EHUX130k05b		No BLAST hit (e<1.00e-04) to EHux_TaxaDB-THAPS.fas	No BLAST hit
gi|208420462_RF1	EHUX130k06a	Y	Similar (e=1.00e-134) to TPSJGI21815_THAPS__TPSJGI21815 estExt_fgenesh1_pg.C_chr_30499	S-adenosylmethionine synthetase	PF00438.14/PF02772.10/PF02773.10	S-Adomet_synt	Domain	No_clan
gi|208408302_RF-3	EHUX130k06b	Y	Similar (e=1.00e-102) to TPSJGI21815_THAPS__TPSJGI21815 estExt_fgenesh1_pg.C_chr_30499	S-adenosylmethionine synthetase	PF02773.10	S-Adomet_synt	Domain	No_clan
gi|208409665_RF2	EHUX130k06c	Y	Similar (e=9.00e-27) to B9ZZX8_SKECO__B9ZZX8 RecName: Full=S-adenosylmethionine synthase; EC=2.5.1.6; Flags: Fragment;	S-adenosylmethionine synthetase
gi|208409136_RF3	EHUX130k07a	Y	Similar (e=1.00e-110) to Q0P3H4_OSTTA__Q0P3H4 RecName: Full=ATP synthase subunit alpha;	ATP synthase subunit alpha EC 3.6.3.14
gi|208614552_RF3	EHUX130k07a		Similar (e=1.00e-110) to Q0P3H4_OSTTA__Q0P3H4 RecName: Full=ATP synthase subunit alpha;
gi|208409860_RF1	EHUX130k07b		Similar (e=1.00e-118) to VATB1_ACEAT__Q38681 RecName: Full=V-type proton ATPase subunit B 1; Short=V-ATPase subunit B 1; AltName: Full=Vacuolar proton pump subunit B 1;	ATP synthase, vacuolar, subunit b
gi|208405580_RF3	EHUX130k08a	Y	No BLAST hit (e<1.00e-04) to EHux_TaxaDB-THAPS.fas	No BLAST hit
gi|208412524_RF2	EHUX130k08a		No BLAST hit (e<1.00e-04) to EHux_TaxaDB-THAPS.fas
gi|208620829_RF3	EHUX130k08a		No BLAST hit (e<1.00e-04) to EHux_TaxaDB-THAPS.fas
gi|208407130_RF-3	EHUX130k08b		No BLAST hit (e<1.00e-04) to EHux_TaxaDB-THAPS.fas	No BLAST hit
gi|208615626_RF3	EHUX130k09a	Y	Similar (e=4.00e-91) to B7FUT7_PHATR__B7FUT7 SubName: Full=Predicted protein;	Demethylmenaquinone methyltransferase/aldoase (putative)	PF03737.9	Methyltransf_6	Family	No_clan
gi|208649263_RF-2	EHUX130k10a		No BLAST hit (e<1.00e-04) to EHux_TaxaDB-THAPS.fas	No BLAST hit
gi|208404791_RF-1	EHUX130k11a	Y	Similar (e=0.00e+00) to Q5ENR8_ISOGA__Q5ENR8 RecName: Full=Phosphoglycerate kinase; EC=2.7.2.3;	Phosphoglycerate kinase EC 2.7.2.3
gi|208409804_RF2	EHUX130k11a		Similar (e=0.00e+00) to Q5ENR8_ISOGA__Q5ENR8 RecName: Full=Phosphoglycerate kinase; EC=2.7.2.3;
gi|58182779_RF-1	EHUX130k11b		Similar (e=9.00e-82) to Q5ENR8_ISOGA__Q5ENR8 RecName: Full=Phosphoglycerate kinase; EC=2.7.2.3;	Phosphoglycerate kinase EC 2.7.2.3
gi|58183657_RF-2	EHUX130k11c		Similar (e=3.00e-67) to Q5ENR6_PAVLU__Q5ENR6 RecName: Full=Phosphoglycerate kinase; EC=2.7.2.3;	Phosphoglycerate kinase EC 2.7.2.3
gi|208404640_RF2	EHUX130k12a	Y	Similar (e=7.00e-87) to Q2IA76_ISOGA__Q2IA76 SubName: Full=Chloroplast light harvesting protein isoform 3;	Chloroplast light harvesting protein
gi|208406130_RF1	EHUX130k12a		Similar (e=7.00e-87) to Q2IA76_ISOGA__Q2IA76 SubName: Full=Chloroplast light harvesting protein isoform 3;
gi|208411032_RF1	EHUX130k12a		Similar (e=7.00e-87) to Q2IA76_ISOGA__Q2IA76 SubName: Full=Chloroplast light harvesting protein isoform 3;
gi|208412248_RF3	EHUX130k12a		Similar (e=7.00e-87) to Q2IA76_ISOGA__Q2IA76 SubName: Full=Chloroplast light harvesting protein isoform 3;
gi|208413169_RF3	EHUX130k12a		Similar (e=7.00e-87) to Q2IA76_ISOGA__Q2IA76 SubName: Full=Chloroplast light harvesting protein isoform 3;
gi|208415654_RF1	EHUX130k12a		Similar (e=7.00e-87) to Q2IA76_ISOGA__Q2IA76 SubName: Full=Chloroplast light harvesting protein isoform 3;
gi|208418611_RF3	EHUX130k12a		Similar (e=7.00e-87) to Q2IA76_ISOGA__Q2IA76 SubName: Full=Chloroplast light harvesting protein isoform 3;
gi|242201770_RF2	EHUX130k12a		Similar (e=7.00e-87) to Q2IA76_ISOGA__Q2IA76 SubName: Full=Chloroplast light harvesting protein isoform 3;
gi|37697300_RF2	EHUX130k12b	Y	Similar (e=1.00e-45) to Q2IA76_ISOGA__Q2IA76 SubName: Full=Chloroplast light harvesting protein isoform 3;	Chloroplast light harvesting protein
gi|208403128_RF-1	EHUX130k12c		Similar (e=2.00e-51) to Q2IA78_ISOGA__Q2IA78 SubName: Full=Chloroplast light harvesting protein isoform 1;	Chloroplast light harvesting protein
gi|208420374_RF1	EHUX130k12c		Similar (e=2.00e-51) to Q2IA78_ISOGA__Q2IA78 SubName: Full=Chloroplast light harvesting protein isoform 1;
gi|208421529_RF3	EHUX130k12c		Similar (e=2.00e-51) to Q2IA78_ISOGA__Q2IA78 SubName: Full=Chloroplast light harvesting protein isoform 1;
gi|261421895_RF3	EHUX130k12d		Similar (e=4.00e-30) to D7FPU8_ECTSI__D7FPU8 SubName: Full=Light harvesting complex protein;	Chloroplast light harvesting protein
gi|58188234_RF-3	EHUX130k12e		Similar (e=2.00e-20) to Q2IA78_ISOGA__Q2IA78 SubName: Full=Chloroplast light harvesting protein isoform 1;	Chloroplast light harvesting protein
gi|58188245_RF-3	EHUX130k12f	Y	Similar (e=1.00e-51) to Q5ENP2_ISOGA__Q5ENP2 SubName: Full=Chloroplast photosystem II 12 kDa extrinsic protein; Flags: Fragment;	Photosystem II 12 kDa extrinsic protein (chloroplastic)
gi|208649263_RF3	EHUX130k13a	Y	No BLAST hit (e<1.00e-04) to EHux_TaxaDB-THAPS.fas	No BLAST hit
gi|208419246_RF-3	EHUX130k13b		No BLAST hit (e<1.00e-04) to EHux_TaxaDB-THAPS.fas	No BLAST hit
gi|208403390_RF3	EHUX130k14a	Y	Similar (e=1.00e-162) to Q5ENS1_ISOGA__Q5ENS1 SubName: Full=Chloroplast phosphoribulokinase; Flags: Fragment;	Phosphoribulokinase (chloroplastic) EC 2.7.1.19
gi|208426700_RF1	EHUX130k14a		Similar (e=1.00e-162) to Q5ENS1_ISOGA__Q5ENS1 SubName: Full=Chloroplast phosphoribulokinase; Flags: Fragment;
gi|208411579_RF1	EHUX130k15a		Similar (e=5.00e-49) to B9Q4V7_TOXGO__B9Q4V7 RecName: Full=ATP synthase gamma chain;	ATP synthase, gamma chain
gi|261457160_RF1	EHUX130k15b		Similar (e=2.00e-17) to Q2IA11_PAVLU__Q2IA11 RecName: Full=ATP synthase gamma chain;	ATP synthase, gamma chain
gi|208416283_RF-2	EHUX130k16a		No BLAST hit (e<1.00e-04) to EHux_TaxaDB-THAPS.fas	No BLAST hit
gi|208416283_RF3	EHUX130k17a		No BLAST hit (e<1.00e-04) to EHux_TaxaDB-THAPS.fas	No BLAST hit
gi|208426995_RF1	EHUX130k18a	Y	No BLAST hit (e<1.00e-04) to EHux_TaxaDB-THAPS.fas	Clathrin light chain (putative)	PF01086.11	Clathrin_Ig_Ch	Family	No_clan
gi|208403215_RF3	EHUX130k19a		No BLAST hit (e<1.00e-04) to EHux_TaxaDB-THAPS.fas	PDZ domain containing protein (putative)	PF00595.18	PDZ	Domain	CL0466	PDZ domain-like peptide-binding superfamily
gi|208416283_RF2	EHUX130k20a		No BLAST hit (e<1.00e-04) to EHux_TaxaDB-THAPS.fas	No BLAST hit
gi|208411415_RF2	EHUX130k21a	Y	Similar (e=1.00e-80) to TPSJGI23918_THAPS__TPSJGI23918 estExt_fgenesh1_pg.C_chr_90050	Predicted protein
gi|208412791_RF-3	EHUX130k21a		Similar (e=1.00e-80) to TPSJGI23918_THAPS__TPSJGI23918 estExt_fgenesh1_pg.C_chr_90050
gi|58181884_RF-3	EHUX130k21a		Similar (e=1.00e-80) to TPSJGI23918_THAPS__TPSJGI23918 estExt_fgenesh1_pg.C_chr_90050
gi|261455016_RF1	EHUX130k21b	Y	Similar (e=6.00e-83) to B7GDC2_PHATR__B7GDC2 SubName: Full=Predicted protein;	Predicted protein
gi|208406001_RF2	EHUX130k21c	Y	Similar (e=6.00e-48) to TPSJGI24512_THAPS__TPSJGI24512 estExt_fgenesh1_pg.C_chr_120214	Predicted protein
gi|208410348_RF1	EHUX130k22a		Similar (e=1.00e-143) to Q2IA80_ISOGA__Q2IA80 SubName: Full=Chloroplast O-acetyl-serine lyase; Flags: Fragment;	Chloroplast O-acetyl-serine lyase
gi|208422120_RF1	EHUX130k22a		Similar (e=1.00e-143) to Q2IA80_ISOGA__Q2IA80 SubName: Full=Chloroplast O-acetyl-serine lyase; Flags: Fragment;
gi|58182613_RF-3	EHUX130k22b		Similar (e=1.00e-59) to Q2IA80_ISOGA__Q2IA80 SubName: Full=Chloroplast O-acetyl-serine lyase; Flags: Fragment;	Chloroplast O-acetyl-serine lyase
gi|208416599_RF2	EHUX130k23a		No BLAST hit (e<1.00e-04) to EHux_TaxaDB-THAPS.fas	No BLAST hit
gi|208416599_RF3	EHUX130k24a		No BLAST hit (e<1.00e-04) to EHux_TaxaDB-THAPS.fas	No BLAST hit
gi|208416599_RF1	EHUX130k25a		No BLAST hit (e<1.00e-04) to EHux_TaxaDB-THAPS.fas	No BLAST hit
gi|208425973_RF3	EHUX130k26a	Y	Similar (e=1.00e-106) to B9Q7N9_TOXGO__B9Q7N9 RecName: Full=Adenosylhomocysteinase; EC=3.3.1.1;	Adenosylhomocysteinase EC 3.3.1.1
gi|208404205_RF1	EHUX130k27a	Y	No BLAST hit (e<1.00e-04) to EHux_TaxaDB-THAPS.fas	Photosystem II oxygen evolving enhancer protein (putative)	PF05757.5	PsbQ	Family	No_clan
gi|261429940_RF1	EHUX130k27a		No BLAST hit (e<1.00e-04) to EHux_TaxaDB-THAPS.fas
gi|58182813_RF-3	EHUX130k27b	Y	No BLAST hit (e<1.00e-04) to EHux_TaxaDB-THAPS.fas	Photosystem II oxygen evolving enhancer protein (putative)	PF05757.5	PsbQ	Family	No_clan
gi|58182813_RF-2	EHUX130k27c		No BLAST hit (e<1.00e-04) to EHux_TaxaDB-THAPS.fas	No BLAST hit
gi|208614720_RF3	EHUX130k28a		Similar (e=1.00e-147) to Q9AR87_ODOSI__Q9AR87 RecName: Full=Delta-aminolevulinic acid dehydratase; EC=4.2.1.24;	Delta-aminolevulinic acid dehydratase EC 4.2.1.24
gi|261444019_RF1	EHUX130k28a		Similar (e=1.00e-147) to Q9AR87_ODOSI__Q9AR87 RecName: Full=Delta-aminolevulinic acid dehydratase; EC=4.2.1.24;
gi|261452079_RF2	EHUX130k29a	Y	Similar (e=1.00e-130) to Q5ENS8_ISOGA__Q5ENS8 RecName: Full=Ferredoxin--NADP reductase; EC=1.18.1.2; Flags: Fragment;	Ferredoxin--NADP reductase
gi|261454350_RF1	EHUX130k30a		Similar (e=1.00e-93) to D8LBH8_ECTSI__D8LBH8 SubName: Full=Ribulose-phosphate 3-epimerase; EC=5.1.3.1;	Ribulose-phosphate 3-epimerase EC 5.1.3.1
gi|51532098_RF-3	EHUX130k30a		Similar (e=1.00e-93) to D8LBH8_ECTSI__D8LBH8 SubName: Full=Ribulose-phosphate 3-epimerase; EC=5.1.3.1;
gi|208423090_RF2	EHUX130k30b		Similar (e=5.00e-86) to D8LBH8_ECTSI__D8LBH8 SubName: Full=Ribulose-phosphate 3-epimerase; EC=5.1.3.1;
gi|208626887_RF3	EHUX130k31a		No BLAST hit (e<1.00e-04) to EHux_TaxaDB-THAPS.fas	No BLAST hit
gi|208411314_RF3	EHUX130k31b		No BLAST hit (e<1.00e-04) to EHux_TaxaDB-THAPS.fas	No BLAST hit
gi|208404150_RF2	EHUX130k32a		Similar (e=1.00e-142) to D8LRL3_ECTSI__D8LRL3 SubName: Full=ATP-sulfurylase; EC=2.7.7.4;	ATP-sulfurylase EC 2.7.7.4
gi|261429738_RF3	EHUX130k32a		Similar (e=1.00e-142) to D8LRL3_ECTSI__D8LRL3 SubName: Full=ATP-sulfurylase; EC=2.7.7.4;
gi|208401585_RF2	EHUX130k33a	Y	Similar (e=2.00e-81) to D0P2Z9_PHYIN__D0P2Z9 SubName: Full=Adenylate kinase, putative;	Adenylate kinase (putative) EC 2.7.4.3
gi|208401948_RF3	EHUX130k34a	Y	Similar (e=1.00e-129) to Q8L878_ISOGA__Q8L878 SubName: Full=Oxygen evolving enhancer 1;	Photosysten II oxygen evolving enhancer protein (chloroplastic)
gi|208404833_RF-2	EHUX130k34a		Similar (e=1.00e-129) to Q8L878_ISOGA__Q8L878 SubName: Full=Oxygen evolving enhancer 1;
gi|208408275_RF-2	EHUX130k34a		Similar (e=1.00e-129) to Q8L878_ISOGA__Q8L878 SubName: Full=Oxygen evolving enhancer 1;
gi|58182927_RF-1	EHUX130k34a		Similar (e=1.00e-129) to Q8L878_ISOGA__Q8L878 SubName: Full=Oxygen evolving enhancer 1;
gi|261447712_RF1	EHUX130k35a	Y	Similar (e=1.00e-143) to CYF_EMIHU__Q4G3D7 RecName: Full=Apocytochrome f; Flags: Precursor;	Apocytochrome f
gi|58188014_RF-2	EHUX130k36a		No BLAST hit (e<1.00e-04) to EHux_TaxaDB-THAPS.fas	No BLAST hit
gi|58188014_RF-1	EHUX130k37a		No BLAST hit (e<1.00e-04) to EHux_TaxaDB-THAPS.fas	No BLAST hit
gi|208419309_RF2	EHUX130k38a		Similar (e=4.00e-17) to B7GER2_PHATR__B7GER2 SubName: Full=Predicted protein;	Gbp1p telomere-binding protein (putative)
gi|116109262_RF-1	EHUX130k39a		No BLAST hit (e<1.00e-04) to EHux_TaxaDB-THAPS.fas	No BLAST hit
gi|208407235_RF-3	EHUX130k40a		No BLAST hit (e<1.00e-04) to EHux_TaxaDB-THAPS.fas	No BLAST hit
gi|208418655_RF-3	EHUX130k40a		No BLAST hit (e<1.00e-04) to EHux_TaxaDB-THAPS.fas	No BLAST hit
gi|208421348_RF2	EHUX130k41a		Similar (e=4.00e-09) to C1N7U2_MICPS__C1N7U2 SubName: Full=Predicted protein;	ETC complex I protein (putative)	PF04716.8	ETC_C1_NDUFA5	Family	No_clan
gi|208407026_RF-2	EHUX130k42a		Similar (e=7.00e-63) to RK1_ODOSI__P49544 RecName: Full=50S ribosomal protein L1, chloroplastic;	50S ribosomal protein L1 (chloroplastic)
gi|261422784_RF1	EHUX130k42a		Similar (e=7.00e-63) to RK1_ODOSI__P49544 RecName: Full=50S ribosomal protein L1, chloroplastic;
gi|51533529_RF2	EHUX130k42b		Similar (e=9.00e-48) to Q2IA22_PAVLU__Q2IA22 RecName: Full=Ribosomal protein; Flags: Fragment;	50S ribosomal protein L1 (chloroplastic)
gi|208411587_RF1	EHUX130k43a		Similar (e=8.00e-61) to EFTS_RHDSA__A6MVX0 RecName: Full=Elongation factor Ts, chloroplastic; Short=EF-Ts;	Elongation factor Ts (chloroplastic)
gi|208417731_RF1	EHUX130k43a		Similar (e=8.00e-61) to EFTS_RHDSA__A6MVX0 RecName: Full=Elongation factor Ts, chloroplastic; Short=EF-Ts;
gi|261443985_RF1	EHUX130k44a	Y	No BLAST hit (e<1.00e-04) to EHux_TaxaDB-THAPS.fas	ETC complex I protein (putative)	PF04716.8	ETC_C1_NDUFA5	Family	No_clan
gi|261447001_RF3	EHUX130k44a		No BLAST hit (e<1.00e-04) to EHux_TaxaDB-THAPS.fas
gi|208403303_RF1	EHUX130k45a	Y	Similar (e=2.00e-97) to D0N0G8_PHYIN__D0N0G8 SubName: Full=Glycerol-3-phosphate dehydrogenase;	Glycerol-3-phosphate dehydrogenase EC 1.1.1.8
gi|261433376_RF1	EHUX130k45a		Similar (e=2.00e-97) to D0N0G8_PHYIN__D0N0G8 SubName: Full=Glycerol-3-phosphate dehydrogenase;
gi|261447951_RF3	EHUX130k45a		Similar (e=2.00e-97) to D0N0G8_PHYIN__D0N0G8 SubName: Full=Glycerol-3-phosphate dehydrogenase;
gi|261436867_RF1	EHUX130k45b		Similar (e=4.00e-43) to D0N0G8_PHYIN__D0N0G8 SubName: Full=Glycerol-3-phosphate dehydrogenase;	Glycerol-3-phosphate dehydrogenase EC 1.1.1.8
gi|208424787_RF2	EHUX130k46a		No BLAST hit (e<1.00e-04) to EHux_TaxaDB-THAPS.fas	No BLAST hit
gi|208629228_RF2	EHUX130k47a		No BLAST hit (e<1.00e-04) to EHux_TaxaDB-THAPS.fas	No BLAST hit
gi|261424790_RF3	EHUX130k48a		No BLAST hit (e<1.00e-04) to EHux_TaxaDB-THAPS.fas	No BLAST hit
gi|58188493_RF-2	EHUX130k49a		No BLAST hit (e<1.00e-04) to EHux_TaxaDB-THAPS.fas	No BLAST hit
gi|261439503_RF3	EHUX130k50a	Y	Similar (e=5.00e-16) to D7FQE6_ECTSI__D7FQE6 SubName: Full=FK506-binding protein 1;	FKBP-type peptidyl-prolyl cis-trans isomerase
gi|208401460_RF1	EHUX130k50b	Y	Similar (e=6.00e-30) to TPSJGI34104_THAPS__TPSJGI34104 e_gw1.5.536.1	FKBP-type peptidyl-prolyl cis-trans isomerase	PF00254.22	FKBP_C	Domain	No_clan
gi|208407819_RF2	EHUX130k51a	Y	Similar (e=8.00e-08) to C1MPY8_MICPS__C1MPY8 SubName: Full=Predicted protein;	Ankyrin repeat protein (putative)	PF12796.1	Ank_2	Family	CL0465	Ankyrin repeat superfamily
gi|208420952_RF-1	EHUX130k51a		Similar (e=8.00e-08) to C1MPY8_MICPS__C1MPY8 SubName: Full=Predicted protein;
gi|261447398_RF3	EHUX130k52a	Y	Similar (e=3.00e-46) to D8UIE7_VOLCA__D8UIE7 SubName: Full=Putative uncharacterized protein;	Nascent polypeptide-associated complex protein/transcription factor (putative)	PF01849.12/PF00627.25	NAC/UBA	Family/Domain	No_clan/CL0214	UBA superfamily
gi|208651886_RF3	EHUX130k53a		No BLAST hit (e<1.00e-04) to EHux_TaxaDB-THAPS.fas	No BLAST hit
gi|261440043_RF-1	EHUX130k54a		No BLAST hit (e<1.00e-04) to EHux_TaxaDB-THAPS.fas	No BLAST hit
gi|208630256_RF-3	EHUX130k55a		No BLAST hit (e<1.00e-04) to EHux_TaxaDB-THAPS.fas	No BLAST hit
gi|208639276_RF-3	EHUX130k55a		No BLAST hit (e<1.00e-04) to EHux_TaxaDB-THAPS.fas	No BLAST hit
gi|208653511_RF1	EHUX130k56a		No BLAST hit (e<1.00e-04) to EHux_TaxaDB-THAPS.fas	No BLAST hit
gi|208650325_RF3	EHUX130k57a	Y	No BLAST hit (e<1.00e-04) to EHux_TaxaDB-THAPS.fas	No BLAST hit
gi|208653511_RF2	EHUX130k58a		No BLAST hit (e<1.00e-04) to EHux_TaxaDB-THAPS.fas	No BLAST hit
gi|261432075_RF1	EHUX130k59a		No BLAST hit (e<1.00e-04) to EHux_TaxaDB-THAPS.fas	No BLAST hit
gi|208653511_RF3	EHUX130k60a		No BLAST hit (e<1.00e-04) to EHux_TaxaDB-THAPS.fas	No BLAST hit
gi|261426707_RF3	EHUX130k61a		Similar (e=1.00e-37) to TPSJGI32845_THAPS__TPSJGI32845 e_gw1.3.574.1	NAD-dependent epimerase/dehydratase	PF05368.7	NmrA	Family	CL0063	FAD/NAD(P)-binding Rossman fold superfamily
gi|261446722_RF3	EHUX130k62a		Similar (e=8.00e-09) to D8LG85_ECTSI__D8LG85 SubName: Full=Ribosomal protein rpS22, plastidal;	Ribosomal protein rpS22
gi|58186293_RF-2	EHUX130k63a		No BLAST hit (e<1.00e-04) to EHux_TaxaDB-THAPS.fas	No BLAST hit
gi|58186293_RF-1	EHUX130k64a		No BLAST hit (e<1.00e-04) to EHux_TaxaDB-THAPS.fas	No BLAST hit
gi|261423099_RF1	EHUX130k65a	Y	Similar (e=4.00e-06) to D8LKH7_ECTSI__D8LKH7 SubName: Full=Putative uncharacterized protein;	Predicted protein	PF02575.10	DUF149	Family	No_clan
gi|58186736_RF1	EHUX130k65b		Similar (e=2.00e-13) to D8LKH7_ECTSI__D8LKH7 SubName: Full=Putative uncharacterized protein;	Predicted protein	PF02575.10	DUF149	Family	No_clan
gi|208406753_RF3	EHUX130k66a		No BLAST hit (e<1.00e-04) to EHux_TaxaDB-THAPS.fas	No BLAST hit
gi|208639276_RF1	EHUX130k67a		No BLAST hit (e<1.00e-04) to EHux_TaxaDB-THAPS.fas	No BLAST hit
gi|58187023_RF-1	EHUX130k68a		Similar (e=2.00e-13) to D8LJF6_ECTSI__D8LJF6 SubName: Full=Putative uncharacterized protein;	Peroxiredoxin Q	PF00578.15	AhpC_TSA	Domain	CL0172 predicted_active_site[47]	Thioredoxin like
gi|208414551_RF-2	EHUX130k69a		Similar (e=6.00e-10) to Q2IA30_KARMI__Q2IA30 SubName: Full=Chloroplast light harvesting protein isoform 10;	Chloroplast light harvesting protein
gi|208414552_RF1	EHUX130k69a		Similar (e=6.00e-10) to Q2IA30_KARMI__Q2IA30 SubName: Full=Chloroplast light harvesting protein isoform 10;
gi|58183563_RF-3	EHUX130k70a		Similar (e=2.00e-47) to Q6SL82_PHYNI__Q6SL82 SubName: Full=Heat shock protein 70;	Heat shock protein 70
gi|115599928_RF-1	EHUX130k71a		Similar (e=5.00e-55) to TPSJGI24887_THAPS__TPSJGI24887 estExt_fgenesh1_pg.C_chr_140244	Thioredoxin	PF00085.14	Thioredoxin	Domain	CL0172 predicted_active_site[90,93,90,93]	Thioredoxin like
gi|208654488_RF1	EHUX130k71a		Similar (e=5.00e-55) to TPSJGI24887_THAPS__TPSJGI24887 estExt_fgenesh1_pg.C_chr_140244
gi|208420615_RF-1	EHUX130k72a	Y	Similar (e=2.00e-15) to TPSJGI2343_THAPS__TPSJGI2343 fgenesh1_pg.C_chr_2000298	Predicted protein
gi|58186001_RF-3	EHUX130k73a		Similar (e=2.00e-14) to C1N7K9_MICPS__C1N7K9 RecName: Full=Peptidyl-prolyl cis-trans isomerase; EC=5.2.1.8;	Peptidyl-prolyl cis-trans isomerase EC 5.2.1.8
gi|261439382_RF3	EHUX130k74a		Similar (e=4.00e-28) to TPSJGI26991_THAPS__TPSJGI26991 estExt_Genewise1.C_chr_20178	Glutaredoxin (putative)	PF00462.18	Glutaredoxin	Domain	CL0172 predicted_active_site[88]	Thioredoxin like
gi|208401444_RF1	EHUX130k75a		Similar (e=6.00e-72) to C1N203_MICPS__C1N203 RecName: Full=Peptidyl-prolyl cis-trans isomerase; EC=5.2.1.8;	Peptidyl-prolyl cis-trans isomerase EC 5.2.1.8
gi|261440496_RF2	EHUX130k76a	Y	No BLAST hit (e<1.00e-04) to EHux_TaxaDB-THAPS.fas	No BLAST hit
gi|261436250_RF3	EHUX130k77a		Similar (e=3.00e-24) to Q2IA87_ISOGA__Q2IA87 SubName: Full=Chloroplast 50S ribosomal protein L9;	50S ribosomal protein L9 (chloroplastic)
gi|261439689_RF2	EHUX130k78a		No BLAST hit (e<1.00e-04) to EHux_TaxaDB-THAPS.fas	No BLAST hit
gi|261457504_RF1	EHUX130k79a		Similar (e=8.00e-38) to TPSJGI10741_THAPS__TPSJGI10741 fgenesh1_pg.C_chr_17000204	Predicted protein
gi|208651028_RF2	EHUX130k80a		Similar (e=3.00e-60) to Q2IA85_ISOGA__Q2IA85 SubName: Full=Chloroplast 50S ribosomal protein L17; Flags: Fragment;	50S ribosomal protein L17 (chloroplastic)
gi|261451935_RF1	EHUX130k81a	Y	Similar (e=6.00e-42) to A8J9T0_CHLRE__A8J9T0 RecName: Full=40S ribosomal protein S12;	40S ribosomal protein S12
gi|208408373_RF-2	EHUX130k82a	Y	Similar (e=7.00e-06) to D8LLR3_ECTSI__D8LLR3 SubName: Full=Putative uncharacterized protein;	Predicted protein
gi|261443622_RF1	EHUX130k82a		Similar (e=7.00e-06) to D8LLR3_ECTSI__D8LLR3 SubName: Full=Putative uncharacterized protein;
gi|208655316_RF1	EHUX130k83a	Y	No BLAST hit (e<1.00e-04) to EHux_TaxaDB-THAPS.fas	No BLAST hit
gi|261421778_RF3	EHUX130k84a	Y	Similar (e=1.00e-15) to TPSBD1863_THAPS__TPSBD1863 estExt_fgenesh1_pg.C_bd_20x50032	Predicted protein
gi|58182046_RF-3	EHUX130k85a		Similar (e=2.00e-44) to C1MRV4_MICPS__C1MRV4 SubName: Full=Predicted protein;	60S ribosomal protein L23a	PF03939.7/PF00276.14	Ribosomal protein L23eN/Ribosomal L23	Family	No_clan/CL0221	RRM-like clan
gi|58184969_RF-3	EHUX130k86a	Y	Similar (e=3.00e-40) to Q2IA86_ISOGA__Q2IA86 SubName: Full=Chloroplast 50S ribosomal protein L12;	50S ribosomal protein L12 (chloroplastic)
gi|208416317_RF2	EHUX130k87a	Y	Similar (e=3.00e-44) to Q01FA5_OSTTA__Q01FA5 RecName: Full=Histone H2A;	Histone H2A
gi|208651291_RF1	EHUX130k88a		Similar (e=1.00e-06) to Q9TLU0_CYACA__Q9TLU0 SubName: Full=Putative uncharacterized protein rpl29;	50S ribosomal protein L29 (chloroplastic)	PF00831.17	Ribosomal L29	Family	CL0346	Ribosomal protein L29, L29p, superfamily
gi|261437303_RF2	EHUX130k89a	Y	Similar (e=4.00e-35) to Q013K3_OSTTA__Q013K3 RecName: Full=Histone H2B;	Histone H2B
gi|208413842_RF2	EHUX130k90a		Similar (e=1.00e-06) to TPSJGI20069_THAPS__TPSJGI20069 gw1.2.803.1	60S acidic ribosomal protein P2	PF00428.13	Ribosomal 60S	Family	No_clan
gi|208627603_RF-3	EHUX130k91a	Y	Similar (e=1.00e-11) to A4RUH8_OSTLU__A4RUH8 SubName: Full=F-ATPase family transporter: protons (Vacuolar);	ATP synthase (vacuolar)
gi|261430814_RF1	EHUX130k92a	Y	Similar (e=4.00e-40) to C1MUM2_MICPS__C1MUM2 RecName: Full=Histone H4;	Histone H4
gi|208649719_RF1	EHUX130k93a		Similar (e=1.00e-23) to A8IDN1_CHLRE__A8IDN1 SubName: Full=Chaperonin 10;	Chaperonin 10
gi|115599094_RF-3	EHUX130k94a		Similar (e=1.00e-22) to A4S8E0_OSTLU__A4S8E0 SubName: Full=Ribosomal protein S21, component of cytosolic 80S ribosome and 40S small subunit;	40S ribosomal protein S21
gi|261426671_RF2	EHUX130k95a		Similar (e=1.00e-10) to D8LIM3_ECTSI__D8LIM3 SubName: Full=Putative uncharacterized protein;	Clp protease adaptor protein	PF02617.11	ClpS	Family	No_clan
gi|58186701_RF-2	EHUX130k96a	Y	Similar (e=1.00e-11) to B7G7Y1_PHATR__B7G7Y1 SubName: Full=Predicted protein;	Cold shock DNA-binding protein (putative)	PF00313.16	CSD	Domain	CL0021	OB-fold
gi|115600661_RF-3	EHUX130k97a	Y	Similar (e=7.00e-25) to Q5ENV5_ISOGA__Q5ENV5 RecName: Full=Acyl carrier protein; Flags: Fragment;	Acyl carrier protein
gi|58189135_RF-2	EHUX130k97a		Similar (e=7.00e-25) to Q5ENV5_ISOGA__Q5ENV5 RecName: Full=Acyl carrier protein; Flags: Fragment;

## Sheet: JGI genome output
Model protein ID	Name	Protein description	Protein mass (Da)	No. peps	iTRAQ?
EHUXJGI108665	fgeneshEH_pg.107__53	40S ribosomal protein S11	100925	2	N
EHUXJGI240824	gm1.31700007	40S ribosomal protein S12	50189	2	Y
EHUXJGI72905	e_gw1.202.7.1	50S ribosomal protein L1	37051	2	N
EHUXJGI86748	estExt_Genewise1.C_130093	50S ribosomal protein L12 (chloroplastic)	22163	6	Y
EHUXJGI271331	estExt_fgeneshEH_pg.C_1180053	Adenosylhomocysteinase	247567	5	N
EHUXJGI284516	estExt_Genemark1.C_3770040	Adenylate kinase	33717	2	N
EHUXJGI199000	gm1.900192	ATP synthase subunit alpha	73712	4	Y
EHUXJGI197716	gm1.700026	ATP synthase subunit gamma	69820	2	N
EHUXJGI210241	gm1.4300006	ATPase/synthase (vacuolar)	16800	6	Y
EHUXJGI67090	e_gw1.58.17.1	Chloroplast O-acetyl-serine lyase	57307	3	N
EHUXJGI111020	fgeneshEH_pg.143__58	Cold shock, DNA binding, stomatin-like protein	55135	2	Y
EHUXJGI69868	e_gw1.108.60.1	Elongation factor Ts	29211	2	N
EHUXJGI239227	gm1.28400038	FKBP-type peptidyl-prolyl cis-trans isomerase	25219	2	Y
EHUXJGI68475	e_gw1.79.80.1	Gbp1p telomere-binding protein (putative)	26967	2	N
EHUXJGI203425	gm1.1900053	Glyceraldehyde 3-phosphate dehydrogenase	51606	2	N
EHUXJGI87542	estExt_Genewise1.C_370090	Glycerol-3-phosphate dehydrogenase	28480	2	Y
EHUXJGI274290	estExt_fgeneshEH_pg.C_5290004	GrpE-like protein	154747	4	N
EHUXJGI95074	fgeneshEH_pg.1__345	Histone demethylase/ Jumonji, PHD finger, ARID domain containing protein	224080	2	N
EHUXJGI369218	fgenesh_newKGs_kg.356__3__EST_ALL.fasta.Contig4850	Histone H1	22498	2	N
EHUXJGI72235	e_gw1.174.16.1	Histone H2A	19728	2	Y
EHUXJGI96192	fgeneshEH_pg.4__422	Histone H2B	158540	8	Y
EHUXJGI255477	gm1.351200001	Histone H3	35945	6	Y
EHUXJGI201707	gm1.1400400	Histone H4	16158	5	Y
EHUXJGI266886	estExt_fgeneshEH_pg.C_70172	Isochorismate synthase/peptidyl-prolyl cis-trans isomerase (putative)	208276	2	N
EHUXJGI270658	estExt_fgeneshEH_pg.C_900006	Mucin-associated surface protein (MASP)	95601	2	N
EHUXJGI110219	fgeneshEH_pg.132__8	No BLAST hit	21198	3	Y
EHUXJGI205571	gm1.2400263	No BLAST hit	26100	6	Y
EHUXJGI218259	gm1.7800158	No BLAST hit	12641	2	Y
EHUXJGI349877	fgenesh_newKGs_kg.4__118__EST_ALL.fasta.Contig12846	No BLAST hit	33219	5	Y
EHUXJGI237243	gm1.24700017	No BLAST hit	19303	2	Y
EHUXJGI269934	estExt_fgeneshEH_pg.C_670039	PDZ domain containing protein (putative)	54934	2	N
EHUXJGI269712	estExt_fgeneshEH_pg.C_610026	Periplasmic binding/iron transport lipoprotein (putative)	111462	6	Y
EHUXJGI270670	estExt_fgeneshEH_pg.C_900057	Phosphoglycerate kinase	25332	6	Y
EHUXJGI109236	fgeneshEH_pg.115__79	Phosphoglycerate kinase	39837	6	N
EHUXJGI61858	e_gw1.5.28.1	Phosphoribulokinase (chloroplastic)	51252	2	N
EHUXJGI265795	estExt_est_orfs.C_710002	Photosystem II oxygen evolving enhancer	47421	6	Y
EHUXJGI96453	fgeneshEH_pg.5__245	Predicted protein	17755	3	Y
EHUXJGI243179	gm1.38000012	Predicted protein	18535	2	Y
EHUXJGI62235	e_gw1.8.13.1	S-adenosylmethionine synthetase	55926	3	Y
EHUXJGI267646	estExt_fgeneshEH_pg.C_160141	S-adenosylmethionine synthetase	41358	3	Y

## Sheet: Quantified IDs
Taxres UniProtKB search
Protein accession	Protein description	Protein mass (Da)	pI	No. peps	No. iTRAQ peps	No. good iTRAQ peps	114:113	116:115	118:117	CI	GM	GM-CI	GM+CI
RR7_EMIHU__Q4G343	30S ribosomal protein S7 (chloroplastic)	22404	10.54	2	2	2	0.277	0.446	0.607	0.447254	0.421698	0.269626	0.65954
CYF_EMIHU__Q4G3D7	Apocytochrome f	41059	9.18	3	3	3	0.875	0.813	0.611	0.214684	0.757495	0.611145	0.938892
ATPX_EMIHU__Q4G3A0	ATP synthase F(0) sector subunit b' (chloroplastic)	22375	4.81	4	2	2	0.95	0.57	0.773	0.290806	0.748042	0.559282	1.00051
ATPA_EMIHU__Q4G397	ATP synthase F(1) sector subunit alpha (chloroplastic)	61395	4.98	8	6	6	0.323	0.775	1.123	0.724029	0.65508	0.31758	1.35125
C7BEK1_PEDMN__C7BEK1	ATP synthase F(1) sector subunit alpha (chloroplastic)	61371	6.51	4	2	2	0.404	0.696	1.105	0.569918	0.677305	0.383065	1.19756
ATPB_EMIHU__Q4G3C8	ATP synthase F(1) sector subunit beta (chloroplastic)	57520	4.74	10	5	4	0.624	1.016	1.085	0.34197	0.882747	0.627076	1.24266
Q4G3D0_EMIHU__Q4G3D0	Clp protease ATP binding subunit	105529	5.46	4	2	2	0.426	0.585	0.743	0.315758	0.569969	0.415642	0.781598
D0MWJ7_PHYIN__D0MWJ7	Histone H2A	19427	11.1	4	2	2	0.485	0.406	0.384	0.138004	0.422863	0.368354	0.485438
C1MUM2_MICPS__C1MUM2	Histone H4	14735	11.48	8	7	7	0.373	0.25	0.557	0.453259	0.373108	0.23713	0.58706
Q5ENR8_ISOGA__Q5ENR8	Phosphoglycerate kinase EC 2.7.2.3	57177	5.04	4	2	2	0.908	1.444	1.479	0.311212	1.24702	0.913515	1.70228
RBL_EMIHU__Q4G3F4	Ribulose bisphosphate carboxylase large chain	61608	5.86	9	4	4	0.17	0.814	0.762	1.00234	0.472436	0.173393	1.28722
BUDAPEST results
*matching peptides after BUDAPEST analysis in parentheses
ESTs making ID*	Protein description	EST strain	n/2n	No. of EST iTRAQ peps	No. good iTRAQ peps	RF	114:113	116:115	118:117	CI	GM	GM-CI	GM+CI
gi|261451935 (4)	40S ribosomal protein S12 (81a)	RCC1216	n	2	2	1	2.089	2.011	0.274	1.31485	1.04801	0.281408	3.90299
gi|58184969 (9)	50S ribosomal protein L12 (chloroplastic) (86a)	CCMP371	2n	4	4	-3	1.945	1.883	0.243	1.34842	0.96189	0.249754	3.70457
gi|115600661 (2)	Acyl carrier protein (97a)	CCMP371	2n	2	2	-3	1.809	2.469	1.012	0.512261	1.65341	0.990622	2.75964
gi|58189135 (2)		CCMP371	2n	2	2	-2	1.809	2.469	1.012	0.512261	1.65341	0.990622	2.75964
gi|208425973 (7)	Adenosylhomocysteinase EC 3.3.1.1 (26a)	CCMP1516	2n	3	3	3	0.267	1.05	1.273	0.963681	0.709321	0.270596	1.85936
gi|208401585 (4)	Adenylate kinase (putative) EC 2.7.4.3 (33a)	CCMP1516	2n	3	3	2	1.446	1.82	0.677	0.585586	1.2123	0.674983	2.17734
gi|208407819 (3)	Ankyrin repeat protein (putative) (51a)	CCMP1516	2n	2	2	2	1.69	1.855	0.467	0.872296	1.13549	0.474623	2.71654
gi|208420952 (3)		CCMP1516	2n	1	N/A	-1
gi|261447712 (3)	Apocytochrome f (35a)	RCC1216	2n	3	3	1	0.875	0.813	0.611	0.214684	0.757495	0.611145	0.938892
gi|208627603 (5)	ATPase/synthase (vacuolar) (91a)	CCMP1516	2n	3	3	-3	2.565	1.973	0.442	1.0734	1.30781	0.447067	3.82577
gi|208614552 (4)	ATP synthase subunit alpha EC 3.6.3.14 (07a)	CCMP1516	2n	2	2	3	0.71	0.962	1.242	0.316792	0.94664	0.689611	1.29947
gi|208409136 (4)		CCMP1516	2n	1	N/A	3
gi|208415654 (4)	Chloroplast light harvesting protein isoform (12a)	CCMP1516	2n	2	2	1	0.328	0.572	0.779	0.496029	0.526747	0.32076	0.865018
gi|208406130 (4)		CCMP1516	2n	2	2	1	0.328	0.572	0.779	0.496029	0.526747	0.32076	0.865018
gi|208404640 (4)		CCMP1516	2n	2	2	2	0.328	0.572	0.779	0.496029	0.526747	0.32076	0.865018
gi|242201770 (4)		CCMP1516	2n	2	2	2	0.328	0.572	0.779	0.496029	0.526747	0.32076	0.865018
gi|208412248 (4)		CCMP1516	2n	2	2	3	0.328	0.572	0.779	0.496029	0.526747	0.32076	0.865018
gi|208418611 (3)		CCMP1516	2n	2	2	3	0.328	0.572	0.779	0.496029	0.526747	0.32076	0.865018
gi|208413169 (4)		CCMP1516	2n	2	2	3	0.328	0.572	0.779	0.496029	0.526747	0.32076	0.865018
gi|208411032 (4)		CCMP1516	2n	2	2	1	0.328	0.572	0.779	0.496029	0.526747	0.32076	0.865018
gi|37697300 (3)	Chloroplast light harvesting protein isoform (12b)	CCMP1516	2n	2	2	2	0.244	0.439	0.904	0.742308	0.459206	0.218589	0.96469
gi|208426995 (4)	Clathrin small chain (putative) (18a)	CCMP1516	2n	3	3	1	1.21	1.358	0.835	0.28755	1.1112	0.833507	1.4814
gi|58186701 (2)	Cold shock DNA-binding protein (putative) (96a)	CCMP371	2n	2	2	-2	2.224	5.998	0.473	1.44859	1.84785	0.434064	7.86649
gi|208615626 (3)	Demethylmenaquinone methyltransferase/aldoase (putative) (09a)	CCMP1516	2n	2	2	3	1.984	1.912	0.402	1.03111	1.15103	0.410468	3.22768
gi|261452079 (6)	Ferredoxin--NADP reductase (29a)	RCC1216	n	3	3	2	0.588	0.902	0.794	0.248591	0.749551	0.584574	0.961088
gi|261447001 (3)	ETC complex I protein (putative) (44a)	RCC1216	n	2	2	3	1.287	1.25	0.729	0.362192	1.05456	0.734132	1.51485
gi|261439503 (3)	FKBP-type peptidyl-prolyl cis-trans isomerase (50a)	RCC1216	2n	2	2	3	1.678	4.675	0.713	1.0654	1.77509	0.611678	5.15133
gi|208401460 (2)	FKBP-type peptidyl-prolyl cis-trans isomerase (50b)	CCMP1516	2n	2	2	1	0.747	1.342	0.672	0.421584	0.876626	0.575072	1.33631
gi|261433376 (4)	Glycerol-3-phosphate dehydrogenase EC 1.1.1.8 (45a)	RCC1216	n	2	2	1	0.781	0.928	0.59	0.25867	0.753385	0.581672	0.975789
gi|208403303 (2)		CCMP1516	2n	2	2	1	0.768	0.889	0.77	0.0947477	0.807082	0.734124	0.887291
gi|261447951 (2)		RCC1216	2n	1	N/A	3
gi|208416317 (3)	Histone H2A (87a)	CCMP1516	2n	3	3	2	0.62	0.547	0.45	0.182754	0.534397	0.445138	0.641554
gi|261437303 (8)	Histone H2B (89a)	RCC1216	2n	3	3	2	0.429	0.403	1.038	0.59874	0.564053	0.309949	1.02648
gi|261430814 (8)	Histone H4 (92a)	RCC1216	n	6	6	1	0.372	0.25	0.563	0.459355	0.374108	0.236321	0.592233
gi|261447398 (2)	Nascent polypetide-associated complex protein/transcription factor (putative) (52a)	RCC1216	n	2	2	3	1.843	1.822	0.337	1.10631	1.04208	0.344696	3.15041
gi|208412524 (5)	No BLAST hit (08a)	CCMP1516	2n	3	3	2	0.762	0.686	0.321	0.533798	0.551562	0.323422	0.940634
gi|208405580 (5)		CCMP1516	2n	3	3	3	0.762	0.686	0.321	0.533798	0.551562	0.323422	0.940634
gi|208620629 (4)		CCMP1516	2n	3	3	3	0.762	0.686	0.321	0.533798	0.551562	0.323422	0.940634
gi|208649263 (8)	No BLAST hit (13a)	CCMP1516	2n	3	3	3	3.28	1.014	0.431	1.15297	1.12753	0.355959	3.57157
gi|261443985 (3)		RCC1216	n	1	N/A	1
gi|208650325 (2)	No BLAST hit (57a)	CCMP1516	2n	2	2	3	1.801	1.416	0.392	0.927678	0.999895	0.395429	2.52837
gi|261440496 (3)	No BLAST hit (76a)	RCC1216	2n	2	2	2	1.164	1.271	0.758	0.31294	1.03894	0.759768	1.42068
gi|208655316 (4)	No BLAST hit (83a)	CCMP1516	2n	2	2	1	1.895	1.703	0.417	0.956071	1.10404	0.424395	2.87212
gi|208404791 (3)	Phosphoglycerate kinase EC 2.7.2.3 (11a)	CCMP1516	2n	2	2	-1	0.897	1.039	0.941	0.0848122	0.957192	0.879358	1.04192
gi|208409804 (7)		CCMP1516	2n	3	3	2	0.997	1.082	1.19	0.100216	1.08682	0.98318	1.20138
gi|208426700 (3)	Phosphoribulokinase (chloroplastic) EC 2.7.1.19 (14a)	CCMP1516	2n	3	3	1	0.721	1.267	0.697	0.379864	0.860297	0.588404	1.25783
gi|208403390 (6)		CCMP1516	2n	3	3	3	0.674	1.434	1.051	0.429391	1.00524	0.654317	1.54438
gi|58188245 (4)	Photosystem II 12 kDa extrinsic protein (chloroplastic) (12f)	CCMP371	2n	2	2	-3	0.703	0.985	0.557	0.324346	0.727918	0.526284	1.0068
gi|208404833 (8)	Photosystem II oxygen evolving enhancer protein (chloroplastic) (34a)	CCMP1516	2n	4	4	-2	1.36	1.142	0.716	0.375326	1.03603	0.711821	1.50791
gi|58182927 (7)		CCMP371	2n	3	3	-1	1.484	1.15	0.743	0.395897	1.08236	0.728513	1.60809
gi|208401948 (6)		CCMP371	2n	3	3	3	1.064	0.989	0.733	0.22344	0.917094	0.733458	1.14671
gi|208408275 (3)		CCMP1516	2n	1	N/A	-2
gi|208404205 (6)	Photosystem II oxygen evolving enhancer (putative) (27a)	RCC1216	n	3	3	1	1.547	0.939	0.815	0.380962	1.05788	0.72275	1.54842
gi|261429940 (7)		CCMP1516	2n	4	4	1	1.381	0.837	0.831	0.329519	0.986673	0.709684	1.37177
gi|58182813 (5)	Photosystem II oxygen evolving enhancer (putative) (27b)	CCMP371	2n	3	3	-3	1.381	0.837	0.831	0.329519	0.986673	0.709684	1.37177
gi|261455016 (3)	Predicted protein (21b)	RCC1216	n	2	2	1	0.983	0.91	0.719	0.184362	0.863193	0.717861	1.03795
gi|261423099 (6)	Predicted protein (65a)	RCC1216	2n	2	2	1	1.849	1.546	0.535	0.758531	1.15213	0.539603	2.45995
gi|208408373 (3)	Predicted protein (82a)	CCMP1516	2n	2	2	-2	1.508	1.673	0.293	1.10586	0.90418	0.299217	2.73227
gi|261443622 (2)		RCC1216	n	2	2	1	1.508	1.673	0.293	1.10586	0.90418	0.299217	2.73227
gi|208411415 (4)	Predicted protein/THAPS genome (21a)	CCMP1516	2n	2	2	1	0.983	0.91	0.719	0.184362	0.863193	0.717861	1.03795
gi|208412791 (3)		CCMP1516	2n	2	2	-3	0.983	0.91	0.719	0.184362	0.863193	0.717861	1.03795
gi|58181884 (2)		CCMP371	2n	2	2	-3	0.983	0.91	0.719	0.184362	0.863193	0.717861	1.03795
gi|208406001 (6)	Predicted protein/THAPS genome (21c)	CCMP1516	2n	3	3	1	1.464	1.468	0.671	0.510588	1.12979	0.678033	1.88253
gi|208420615 (4)	Predicted protein/THAPS genome (72a)	CCMP1516	2n	2	2	1	1.724	1.449	0.556	0.689601	1.11573	0.559848	2.22357
gi|261421778 (5)	Predicted protein/THAPS genome (84a)	RCC1216	2n	3	3	3	2.308	7.084	0.475	1.53628	1.98032	0.426128	9.20306
gi|208420462 (3)	S-adenosylmethionine synthetase EC 2.5.1.6 (06a)	CCMP1516	2n	2	2	1	0.915	0.631	0.644	0.236406	0.719083	0.567687	0.910854
gi|208408302 (7)	S-adenosylmethionine synthetase EC 2.5.1.6 (06b)	CCMP1516	2n	2	2	-3	0.963	0.54	0.491	0.412536	0.634406	0.419957	0.958361
gi|208409665 (4)	S-adenosylmethionine synthetase EC 2.5.1.6 (06c)	CCMP1516	2n	2	2	2	0.961	0.528	0.471	0.433423	0.620573	0.402309	0.957252
gi|261441602 (6)	Ubiquitin family protein (putative) (01f)	RCC1216	2n	2	2	3	1.765	2.183	0.742	0.646849	1.41928	0.743267	2.71013
Genome results
Protein ID	Protein description	Protein mass (Da)		No. peps	No. iTRAQ peps	No. good iTRAQ peps	114:113	116:115	118:117	CI	GM	GM-CI	GM+CI
EHUXJGI240824	40S ribosomal protein S12	50189		2	2	2	2.007	1.886	0.28	1.26696	1.01957	0.287198	3.61951
EHUXJGI86748	50S ribosomal protein L12 (chloroplastic)	22163		6	2	2	1.862	1.829	0.229	1.36335	0.92047	0.235458	3.59837
EHUXJGI199000	ATP synthase alpha subunit	73712		4	2	2	0.648	1.356	1.061	0.42555	0.9769	0.638316	1.49508
EHUXJGI210241	ATPase/synthase (vacuolar)	16800		3	2	2	2.477	1.88	0.445	1.04323	1.27492	0.449174	3.61866
EHUXJGI111020	Cold shock, DNA binding, stomatin-like protein	55135		2	2	2	1.227	1.322	0.702	0.391452	1.04425	0.705991	1.54458
EHUXJGI239227	FKBP-type peptidyl-prolyl cis-trans isomerase	25219		2	2	2	1.583	3.199	0.756	0.816268	1.56437	0.691573	3.53867
EHUXJGI87542	Glycerol-3-phosphate dehydrogenase	28480		2	2	2	0.845	0.754	0.815	0.0658887	0.803764	0.752512	0.858507
EHUXJGI72235	Histone H2A	19728		2	2	2	0.488	0.446	0.385	0.135423	0.437594	0.382171	0.501055
EHUXJGI96192	Histone H2B	158540		8	3	3	0.433	0.522	0.891	0.423788	0.586154	0.383675	0.89549
EHUXJGI255477	Histone H3	35945		6	2	2	0.359	0.196	0.315	0.360359	0.280901	0.195908	0.402769
EHUXJGI201707	Histone H4	16158		5	4	4	0.363	0.213	0.394	0.377917	0.312316	0.214026	0.455744
EHUXJGI96453	Predicted protein	17755		3	2	2	2.22	7.276	0.467	1.55841	1.9612	0.412773	9.31818
EHUXJGI243179	Predicted protein	18535		2	2	2	2.262	7.383	0.46	1.57617	1.97315	0.407979	9.54298
EHUXJGI110219	No BLAST hit	21198		3	3	3	1.322	1.351	0.87	0.280712	1.15825	0.874763	1.53361
EHUXJGI205571	No BLAST hit	26100		6	3	3	2.51	1.01	0.527	0.88718	1.10138	0.453563	2.67444
EHUXJGI218259	No BLAST hit	12641		2	2	2	3.115	2.52	0.305	1.45382	1.33778	0.312609	5.72494
EHUXJGI349877	No BLAST hit	33219		5	3	3	0.818	0.674	0.316	0.568786	0.558513	0.316237	0.986402
EHUXJGI237243	No BLAST hit	19303		2	2	2	1.166	1.356	0.782	0.321842	1.0733	0.777943	1.4808
EHUXJGI270670	Phosphoglycerate kinase	25332		6	2	2	1.05	0.991	1.048	0.037175	1.0293	0.991737	1.06828
EHUXJGI265795	Photosystem II oxygen evolving enhancer	47421		6	3	3	1.116	1.102	0.719	0.283196	0.959824	0.723105	1.27404
EHUXJGI269712	Putative periplasmic binding/iron transport lipoprotein	111462		6	2	2	1.157	0.945	1.226	0.154667	1.1026	0.944599	1.28703
EHUXJGI62235	S-adenosylmethionine synthetase	55926		3	3	3	0.906	0.851	0.505	0.363129	0.730213	0.507861	1.04992
EHUXJGI267646	S-adenosylmethionine synthetase	41358		3	3	3	0.955	0.834	0.488	0.401762	0.729787	0.48833	1.09064
Green highlighting indicates downregulation under high CO2
Number of peptides does not include PTMs

## Sheet: BUDAPEST, Taxres and JGI
This is a combination table of all identifications from the CO2 experiments
Protein identification	Accession (JGI genome ID)	Accessions (UniProt)	Gene name(s) in UniProt ^	Consensus sequence (EST)
30S ribosomal protein S7 (chloroplastic)		Q4G343	rps7		Blue is genome identified only
40S ribosomal protein S11	EHUXJGI108665				Red is if taxa db identified only
40S ribosomal protein S12	EHUXJGI240824			EHUX130k81a	Star and green if present in EST, genome and taxadb datasets
40S ribosomal protein S21				EHUX130k94a
50S ribosomal protein L1 (chloroplastic)	EHUXJGI72905			EHUX130k42a, 42b	Combination by nomenclature/clusters
50S ribosomal protein L12 (chloroplastic)	EHUXJGI86748			EHUX130k86a
50S ribosomal protein L14 (chloroplastic)		C7BEX8, D0VMV8, D8UMU9, B8R194, P11094, P56363	rpl14
50S ribosomal protein L17 (chloroplastic)				EHUX130k80a
50S ribosomal protein L29 (chloroplastic)				EHUX130k88a
50S ribosomal protein L9 (chloroplastic)				EHUX130k77a
60S acidic ribosomal protein P2				EHUX130k90a
60S ribosomal protein L23a				EHUX130k85a
Acyl carrier protein				EHUX130k97a
Adenosylhomocysteinase	EHUXJGI271331			EHUX130k26a
Adenylate kinase (putative)	EHUXJGI284516			EHUX130k33a
Ankyrin repeat protein (putative)				EHUX130k51a
Apocytochrome f		Q4G3D7	petA	EHUX130k35a
ATPase/synthase (vacuolar)	EHUXJGI210241			EHUX130k91a
ATP synthase F(0) sector subunit b' (chloroplastic)		Q4G3A0	atpG
ATP synthase F(1) sector subunit alpha (chloroplastic)		C7BEK1, Q4G397	atpA
ATP synthase F(1) sector subunit beta (chloroplastic)		Q4G3C8	atpB
ATP synthase F(1) sector subunit epsilon (chloroplastic)		Q4G3C9	atpE
ATP synthase subunit alpha	EHUXJGI199000			EHUX130k07a
ATP synthase subunit gamma	EHUXJGI197716			EHUX130k15a, 15b
ATP synthase, vacuolar, subunit b				EHUX130k07b
ATP-sulfurylase				EHUX130k32a
Chaperonin 10				EHUX130k93a
Chloroplast light harvesting protein				EHUX130k12a, 12b, 12c, 12d, 12e, 69a
Chloroplast O-acetyl serine lyase *	EHUXJGI67090	Q2IA80		EHUX130k22a, 22b
Clathrin light chain (putative)				EHUX130k18a
Clp protease adaptor protein				EHUX130k95a
Clp protease ATP binding protein		Q4G3D0	clpC
Cold shock DNA-binding protein (putative)	EHUXJGI111020			EHUX130k96a
Delta-aminolevulinic acid dehydratase				EHUX130k28a
Demethylmenaquinone methyltransferase/aldoase (putative)				EHUX130k09a
Elongation factor Ts (chloroplastic)	EHUXJGI69868			EHUX130k43a
ETC complex I protein (putative)				EHUX130k41a, 44a
Ferredoxin--NADP reductase				EHUX130k29a
FKBP-type peptidyl-prolyl cis-trans isomerase	EHUXJGI239227			EHUX130k50a, 50b
Gbp1p telomere-binding protein	EHUXJGI68475			EHUX130k38a
Glutaredoxin (putative)				EHUX130k74a
Glyceraldehyde-3-phosphate dehydrogenase	EHUXJGI203425	Q6WEV8, Q6WEV4	GAPDH
Glyceraldehyde-3-phosphate dehydrogenase (chloroplastic)		Q2IA54, Q2IA55, Q5R254, Q5R258	GapC1-fd	EHUX130k04a
Glycerol-3-phosphate dehydrogenase	EHUXJGI87542			EHUX130k45a, 45b
GrpE-like protein	EHUXJGI274290
Heat shock protein 70				EHUX130k70a
Histone demethylase/ Jumonji, PHD finger, ARID domain containing protein	EHUXJGI95074
Histone H1	EHUXJGI369218
Histone H2A *	EHUXJGI72235	D0MWJ7		EHUX130k87a
Histone H2B *	EHUXJGI96192	Q00Y53, C1MHL2, A4S1C9, D8LWN1, D8MAP9, Q013K3		EHUX130k89a
Histone H4 *	EHUXJGI201707, EHUXJGI255477	C1MUM2, A4RS62, P82888, Q43083		EHUX130k92a
Isochorismate synthase/peptidyl-prolyl cis-trans isomerase	EHUXJGI266886
Mucin-associated surface protein (MASP)	EHUXJGI270658
NAD-dependent epimerase/dehydratase				EHUX130k61a
Nascent polypeptide-associated complex protein/transcription factor (putative)				EHUX130k52a
No BLAST hit	EHUXJGI349877			EHUX130k03a, 08a, 08b
No BLAST hit				EHUX130k05a, 05b
No BLAST hit				EHUX130k10a
No BLAST hit	EHUXJGI205571			EHUX130k13a, 13b
No BLAST hit				EHUX130k16a
No BLAST hit				EHUX130k17a
No BLAST hit				EHUX130k20a
No BLAST hit				EHUX130k23a
No BLAST hit				EHUX130k24a
No BLAST hit				EHUX130k25a
No BLAST hit				EHUX130k27c
No BLAST hit				EHUX130k31a	31a & b are designated as separate proteins because of their phylogeny
No BLAST hit				EHUX130k31b
No BLAST hit				EHUX130k36a
No BLAST hit				EHUX130k37a
No BLAST hit				EHUX130k39a
No BLAST hit				EHUX130k40a
No BLAST hit				EHUX130k46a
No BLAST hit				EHUX130k47a
No BLAST hit				EHUX130k48a
No BLAST hit				EHUX130k49a
No BLAST hit				EHUX130k53a
No BLAST hit				EHUX130k54a
No BLAST hit				EHUX130k55a
No BLAST hit				EHUX130k56a
No BLAST hit				EHUX130k57a
No BLAST hit				EHUX130k58a
No BLAST hit				EHUX130k59a
No BLAST hit				EHUX130k60a
No BLAST hit				EHUX130k63a
No BLAST hit				EHUX130k64a
No BLAST hit	EHUXJGI218259			EHUX130k66a
No BLAST hit				EHUX130k67a
No BLAST hit	EHUXJGI237243			EHUX130k76a
No BLAST hit				EHUX130k78a
No BLAST hit	EHUXJGI110219			EHUX130k83a
PDZ domain containing protein (putative)	EHUXJGI269934			EHUX130k19a
Periplasmic binding/iron transport lipoprotein (putative)	EHUXJGI269712
Peroxiredoxin Q				EHUX130k68a
Phosphoglycerate kinase *	EHUXJGI270670, EHUXJGI109236	Q5ENR8		EHUX130k11a, 11b, 11c
Phospholipid-transporting ATPase		A8IVJ3	ALA1
Phosphoribulokinase (chloroplastic)	EHUXJGI61858			EHUX130k14a
Photosystem II 12 kDa extrinsic protein (chloroplastic)				EHUX130k12f
Photosysten II oxygen evolving enhancer protein (chloroplastic)	EHUXJGI265795			EHUX130k27a, 27b, 34a
Predicted protein				EHUX130k02a
Predicted protein				EHUX130k21a, 21b, 21c
Predicted protein				EHUX130k65a, 65b
Predicted protein				EHUX130k72a
Predicted protein				EHUX130k79a
Predicted protein				EHUX130k82a
Predicted protein	EHUXJGI243179, EHUXJGI96453			EHUX130k84a
Predicted protein 1		Q00Z00
Predicted protein 2		B7G1C9
Ribosomal protein rpS22				EHUX130k62a
Ribulose bisphosphate carboxylase large chain		Q4G3F4, Q33482, A7UM67, P24624, Q32632	rbcL
Ribulose bisphosphate carboxylase small chain		Q4G3F3	rbcS
Ribulose-phosphate 3-epimerase				EHUX130k30a, 30b
S-adenosylmethionine synthetase *	EHUXJGI62235, EHUXJGI267646	B8BY55, B9ZZX7, TPSJGI21815	AMS1/MATX	EHUX130k06a, 06b, 06c
Thioredoxin				EHUX130k71a
Ubiquitin family protein				EHUX130k01a, 01b, 01c, 01d, 01e, 01f

## Sheet: Pfam BUDAPEST
Sequence ID	Alignment start	Alignment end	Envelope start	Envelope end	Hmm accession/Hmm name/Type	Hmm start	Hmm end	Hmm length	Bit score	Evalue	Significance	Clan/predicted active site residues
01f	13	81	13	81	PF00240.17 ubiquitin Domain	1	69	69	114.5	7.6e-34	1	CL0072		Threshold 0.0001
01f	83	214	79	217	PF09055.5 Sod_Ni Domain	7	125	129	108.6	2.2e-31	1	No_clan
02a	62	183	62	183	PF06549.6 DUF1118 Family	1	116	116	45.7	5e-12	1	No_clan
03a	250	272	224	274	PF05489.6 Phage_tail_X Domain	36	57	60	10.8	0.2	0	CL0187
06a	2	98	1	98	PF00438.14 S-AdoMet_synt_N Domain	12	100	100	105.4	1.1e-30	1	No_clan
06a	112	242	111	270	PF02772.10 S-AdoMet_synt_M Domain	2	103	120	115.4	1.1e-33	1	No_clan
06a	272	299	272	299	PF02773.10 S-AdoMet_synt_C Domain	1	28	138	43.6	1.8e-11	1	No_clan
06b	84	220	84	230	PF02773.10 S-AdoMet_synt_C Domain	1	135	138	212.0	1.8e-63	1	No_clan
09a	76	215	47	215	PF03737.9 Methyltransf_6 Family	29	154	154	48.1	8.6e-13	1	No_clan
18a	151	260	134	261	PF01086.11 Clathrin_lg_ch Family	113	224	225	71.2	9.4e-20	1	No_clan
19a	102	148	99	172	PF00595.18 PDZ Domain	2	57	81	30.0	3.3e-07	1	CL0466
19a	162	218	152	222	PF11316.2 DUF3118 Family	70	126	235	10.3	0.23	0	CL0110
25a	106	179	102	186	PF04931.7 DNA_pol_phi Family	699	767	784	10.1	0.096	0	No_clan
25a	154	239	150	242	PF11748.2 DUF3306 Family	5	77	115	11.0	0.42	0	No_clan
27a	18	208	13	213	PF05757.5 PsbQ Family	6	196	203	52.8	2.5e-14	1	No_clan
27a	153	204	133	210	PF08930.4 DUF1912 Domain	24	75	84	13.7	0.039	0	No_clan
27b	69	157	36	162	PF05757.5 PsbQ Family	108	196	203	43.9	1.4e-11	1	No_clan
27b	102	153	84	159	PF08930.4 DUF1912 Domain	24	75	84	14.1	0.029	0	No_clan
41a	125	164	124	164	PF04716.8 ETC_C1_NDUFA5 Family	18	57	57	23.5	2.3e-05	1	No_clan
44a	125	164	124	164	PF04716.8 ETC_C1_NDUFA5 Family	18	57	57	23.5	2.3e-05	1	No_clan
48a	39	153	27	178	PF04147.6 Nop14 Family	312	397	841	12.5	0.02	0	No_clan
48a	49	144	19	153	PF03153.7 TFIIA Family	210	302	352	9.3	0.75	0	No_clan
48a	63	150	52	193	PF11800.2 RP-C_C Family	15	102	208	10.0	0.42	0	No_clan
48a	90	153	51	198	PF02724.8 CDC45 Family	125	184	627	11.8	0.036	0	No_clan
49a	9	47	1	91	PF05479.5 PsaN Family	15	53	138	10.5	0.35	0	No_clan
50b	66	163	65	164	PF00254.22 FKBP_C Domain	2	95	96	65.0	3.8e-18	1	No_clan
51a	20	120	20	120	PF12796.1 Ank_2 Family	1	85	89	40.9	1.6e-10	1	CL0465
51a	129	158	128	159	PF00023.24 Ank Repeat	3	32	33	18.8	0.0008	0	CL0465
52a	66	123	66	123	PF01849.12 NAC Family	1	58	58	82.0	1.2e-23	1	No_clan
52a	172	207	170	207	PF00627.25 UBA Domain	3	37	37	22.6	5.3e-05	1	CL0214
57a	63	113	50	190	PF11340.2 DUF3142 Family	24	74	181	11.9	0.1	0	No_clan
58a	63	113	50	190	PF11340.2 DUF3142 Family	24	74	181	11.9	0.1	0	No_clan
61a	36	164	36	174	PF05368.7 NmrA Family	1	103	233	23.5	2.2e-05	1	CL0063
61a	70	121	66	132	PF02225.16 PA Family	34	78	101	8.8	0.97	0	No_clan
65a	36	75	28	115	PF05268.5 GP38 Family	157	196	260	12.1	0.078	0	No_clan
65a	84	174	84	175	PF02575.10 DUF149 Family	1	92	93	47.3	1.1e-12	1	No_clan
65b	80	170	79	170	PF02575.10 DUF149 Family	2	93	93	61.2	5e-17	1	No_clan
66a	101	169	90	174	PF08229.5 SHR3_chaperone Domain	129	195	196	13.1	0.026	0	No_clan
66a	110	169	95	175	PF01770.12 Folate_carrier Family	170	228	412	15.9	0.0029	0	CL0015
66a	133	171	83	177	PF02862.11 DDHD Family	126	171	227	11.2	0.19	0	No_clan
66a	134	172	93	177	PF09739.3 DUF2044 Family	91	130	527	7.5	0.91	0	No_clan
68a	27	123	16	125	PF00578.15 AhpC-TSA Domain	21	122	124	39.6	2.9e-10	1	CL0172 predicted_active_site[47]
71a	73	161	61	164	PF00085.14 Thioredoxin Domain	13	100	104	36.2	3e-09	1	CL0172 predicted_active_site[90,93,90,93]
74a	20	34	18	38	PF08139.6 LPAM_1 Motif	5	19	26	11.9	0.17	0	CL0421
74a	80	141	80	142	PF00462.18 Glutaredoxin Domain	1	59	60	68.2	3.4e-19	1	CL0172 predicted_active_site[88]
76a	11	116	2	134	PF04285.6 DUF444 Family	116	225	421	11.3	0.076	0	CL0128
78a	10	96	3	108	PF07888.5 CALCOCO1 Family	163	246	546	10.5	0.11	0	No_clan
78a	11	60	4	97	PF06757.7 Ins_allergen_rp Family	57	106	179	11.7	0.11	0	No_clan
78a	12	88	4	102	PF02637.12 GatB_Yqey Domain	44	116	149	13.8	0.028	0	CL0279
85a	2	53	1	54	PF03939.7 Ribosomal_L23eN Family	2	53	54	60.1	1.3e-16	1	No_clan
85a	57	115	53	117	PF08656.4 DASH_Dad3 Family	9	58	78	12.5	0.072	0	No_clan
85a	60	138	60	139	PF00276.14 Ribosomal_L23 Family	1	91	92	60.0	1.3e-16	1	CL0221
85a	67	102	66	113	PF01206.1 SirA Family	15	50	70	12.5	0.065	0	CL0397
85a	75	112	49	113	PF07194.5 P2 Family	42	82	84	11.9	0.12	0	No_clan
88a	62	98	61	103	PF00993.14 MHC_II_alpha Domain	40	77	82	12.3	0.073	0	CL0343
88a	69	124	67	124	PF00831.17 Ribosomal_L29 Family	3	58	58	40.2	1.6e-10	1	CL0346
90a	16	105	5	112	PF12938.1 M_domain Domain	39	113	235	13.8	0.03	0	No_clan
90a	22	118	22	118	PF00428.13 Ribosomal_60s Family	1	88	88	69.9	1.4e-19	1	No_clan
95a	7	76	6	81	PF02617.11 ClpS Family	2	71	82	30.5	1.7e-07	1	No_clan
96a	8	47	7	48	PF00313.16 CSD Domain	29	66	67	30.7	1.5e-07	1	CL0021

## Sheet: Taxres&taxres Mar Biotech 2011
	Gene name(s) in UniProt ^	Accessions (CO2)	Accessions (Mar Biotechnol 2011)
30S ribosomal protein S7 (chloroplastic) **	rps7	Q4G343	Q4G343
50S ribosomal protein L14 (chloroplastic)	rpl14	C7BEX8, D0VMV8, D8UMU9, B8R194, P11094, P56363
Acetyl-CoA carboxylase			B6KQ38
Actin	type 1 actin		Q41205
ADP-ribosylation factor		A3FQ99
Apocytochrome f	petA	Q4G3D7
ATP synthase F(0) sector subunit b (chloroplastic)	atpF		Q4G399
ATP synthase F(0) sector subunit b' (chloroplastic) **	atpG	Q4G3A0	Q4G3A0
ATP synthase F(1) sector subunit delta (chloroplastic)	atpD		Q4G398
ATP synthase F(1) sector subunit epsilon (chloroplastic)	atpE	Q4G3C9
ATP synthase F(1) sector subunit alpha (chloroplastic) **	atpA	C7BEK1, Q4G397	Q4G397
ATP synthase F(1) sector subunit beta (chloroplastic) **	atpB	Q4G3C8	Q4G3C8
ATP synthase, subunit beta	ATPsynth-beta		B6KBY3, Q4YUP6
ATP ase/synthase, vacuolar, catalytic subunit a			Q4YUW5, Q4XX14, B6KAW0, Q5CEQ9
Cell division cycle protein 48			Q1JSD1, A0DVN2, Q4N783, Q5CKA3
Chloroplast O-acetyl serine lyase **		Q2IA80	Q2IA80
Clathrin heavy chain	CHC		B7G4Y3
Clp protease ATP binding protein **	clpC	Q4G3D0	Q4G3D0, A6MVP5, O78410
Cytochrome c550	psbV		Q4G368
Elongation factor 1 alpha-like	efl		Q5UHI6, Q195D8, Q195E0, A8I1V6
Elongation factor Tu	tufA		Q4G342
Glucose-6-phosphate isomerase	GPI		A5XB27
Glyceraldehyde-3-phosphate dehydrogenase (chloroplastic) **	GapC1-fd	Q2IA54, Q2IA55, Q5R254, Q5R258	Q2IA54
Glyceraldehyde-3-phosphate dehydrogenase	GAPDH	Q6WEV8, Q6WEV4
Glyoxalase			B6KIA0
Heat shock protein 60			A1DRE2
Heat shock protein 70	dnaK/hsp70/GRP78/BiP/hsp11		Q4G366, A5YVT5, B3VMZ7, Q7DM14, Q7Z1E0, Q8IB24, Q9LU13, Q9NHB4,A0SHR9, Q24768, TPSJGI269120, Q4N3K7
			Q0GFF0, Q0WY81, Q234I5, Q4G366, P90655, A3E4D1, B7FQ84, P16394, Q15GB8, Q27146, Q7DM14, Q84KP8, O61006
Heat shock protein 90	HSP90/HSP82		Q5DK81, Q5DK79, A7XG11, Q9Y0T0
Histone H2A *		D0MWJ7	Q49JJ1, Q49JJ2
Histone H2B	HTB3501	Q00Y53, C1MHL2, A4S1C9, D8LWN1, D8MAP9, Q013K3
Histone H3			B6KRZ1, Q5CQU9
Histone H4 **		C1MUM2, A4RS62, P82888, Q43083	P82888
Peptidyl-prolyl cis-trans isomerase			TPSJGI31535
Phosphoglycerate kinase **		Q5ENR8	Q5ENR8
Phospholipid-transporting ATPase	ALA1	A8IVJ3
Photosystem II CP43 apoprotein	psbC		Q4G396	NB in Mar Biotechnol (2011) paper, this was termed "photosystem II 44kDa protein"
Photosystem II CP47 apoprotein	psbB		Q2WEE8, A6MW31, A0T0B2
Photosystem II D2 protein	psbD		Q4G395
Predicted protein 1		Q00Z00
Predicted protein 2		B7G1C9
Pyruvate carboxylase	EhPYC		B9X0T8
Ribulose bisphosphate carboxylase large chain **	rbcL	Q4G3F4, Q33482, A7UM67, P24624, Q32632	Q4G3F4, A6MVT9, A9UK32, Q2KK15, Q2KK34, Q32295, Q32316, Q32331, Q33483, Q760T1, Q8MAA4, Q8MAA5, Q95AK9
Ribulose bisphosphate carboxylase small chain **	rbcS	Q4G3F3	Q4G3F3, O98948
Rubisco expression protein	cbbx		Q4G379
S-adenosylmethionine synthetase	AMS1/MATX	B8BY55, B9ZZX7, TPSJGI21815
Splicing factor Prp8	prp8		B6KJP5, B7FXZ2, Q23FT4, Q962X1, Q9AW36
Red text indicates ID came from iTRAQ paper
Black text indicates ID came from Mar Biotechnol (2011)
Green text and star indicates ID comes from both datasets. If two stars are present, this indicates exact redundancy (i.e. accession number) between two datasets
Bold accession indicates that the database accession originated from Emiliania huxleyi
^ ORF names not given, just genes

## Sheet: CO2 ESTs&EST Mar Biotech 2011
Protein description	BUDAPEST cluster (CO2)	BUDAPEST cluster (Mar Biotechnol 2011)
2-oxogluterate dehydrogenase E1 component		E1516HUX29a
3R-hydroxyacyl-ACP dehydratase		E1516HUX36a
		E371HUX26
40S ribosomal protein S12	EHUX130k81a
40S ribosomal protein S16		E371HUX36a
40S ribosomal protein S19		E371HUX33a
40S ribosomal protein S21	EHUX130k94a
50S ribosomal protein L1 (chloroplastic)	EHUX130k42a, 42b
50S ribosomal protein L12 (chloroplastic)	EHUX130k86a
50S ribosomal protein L17 (chloroplastic)	EHUX130k80a
50S ribosomal protein L29 (chloroplastic)	EHUX130k88a
50S ribosomal protein L4		E371HUX20a
50S ribosomal protein L9 (chloroplastic)	EHUX130k77a
60S acidic ribosomal protein P2	EHUX130k90a
60S ribosomal protein L10		E371HUX32a
60S ribosomal protein L18		E371HUX28a
60S ribosomal protein L23a *	EHUX130k85a	E371HUX34a
60S ribosomal protein L6		E371HUX29a
Acetyl-CoA carboxylase		EHUX06a
		E1516HUX07a, 07b, 07c, 07d, 07e, 07f, 19a, 19b
		E371HUX08a, 08b, 08c, 08d, 08e
Actin		EHUX16a, 16b, 16c
		E1516HUX13a, 13b, 13c, 13d, 13e, 13f
Acyl carrier protein	EHUX130k97a
Adenosylhomocysteinase	EHUX130k26a
Adenylate kinase (putative)	EHUX130k33a
ADP-ribosylation factor		EHUX36a
		E371HUX23a, 23b
Ankyrin repeat protein (putative)	EHUX130k51a
Apocytochrome f	EHUX130k35a
ATP ase/synthase (vacuolar)	EHUX130k91a
ATP synthase subunit alpha *	EHUX130k07a	EHUX04c
ATP synthase subunit beta		EHUX04a
ATP synthase, subunit gamma (chloroplastic)		EHUX14b
ATP synthase, subunit gamma *	EHUX130k15a, 15b	EHUX14a
ATP ase/synthase, vacuolar, subunit a		EHUX04b
		E1516HUX 14a, 14b
ATP ase/synthase, vacuolar, subunit b	EHUX130k07b
ATP ase/synthase, vacuolar, subunit e		EHUX32a
ATP-sulfurylase	EHUX130k32a
Beta adaptin		EHUX28a
Carbamoyl phosphate synthetase		E371HUX14a, 16a
Carbonic anhydrase		EHUX29a
Cell division cycle protein 48		E1516HUX02a, 02b
		E371HUX 06a
Chaperonin 10	EHUX130k93a
Chloroplast light harvesting protein *	EHUX130k12a, 12b, 12c, 12d, 12e, 69a	EHUX23a, 23b, 23c, 23d, 23e, 23f, 23g, 23h, 23i, 23j, 23k, 23l
		E371HUX 12a, 12b, 12c, 12d, 12e, 12f, 12g, 12h, 12i, 12j
Chloroplast O-acetyl-serine lyase *	EHUX130k22a, 22b	EHUX19a, 19b, 19c
Clathrin heavy chain		EHUX20a
		E1516HUX12a, 17a, 20a
		E371HUX11a, 11b, 13a
Clathrin light chain (putative)	EHUX130k18a
Clp protease adaptor protein	EHUX130k95a
Cold shock DNA-binding protein (putative)	EHUX130k96a
Delta-aminolevulinic acid dehydratase	EHUX130k28a
Demethylmenaquinone methyltransferase/aldoase (putative)	EHUX130k09a
Elongation factor 1 alpha like protein		EHUX02a
		E1516HUX03a, 03b
Elongation factor 2		E1516HUX03c, 16b, 16c
		E371HUX04a
Elongation factor 3-related protein		E1516HUX10a, 30a
		E371HUX05c, 05d, 05e
Elongation factor G		E1516HUX16a
Elongation factor Ts (chloroplastic)	EHUX130k43a
Enolase		E1516HUX31a
Enoyl-acyl carrier reductase		EHUX25a
Enoyl-CoA hydratase		E371HUX18a
ETC complex I protein (putative)	EHUX130k41a, 44a
Ferredoxin--NADP reductase *	EHUX130k29a	EHUX10a, 10b
FKBP-type peptidyl-prolyl cis-trans isomerase	EHUX130k50a, 50b
Fructose-bisphosphate aldolase		EHUX21a, 24a
Gbp1p telomere-binding protein (putative)	EHUX130k38a
GDP-mannose 3,5-epimerase		EHUX22a, 22b
Gelosin/severin like		E371HUX17a
Glucose-6-phosphate isomerase		E1516HUX09a, 09b
Glutamate 1-semialdehyde aminomutase		EHUX28a
Glutamine synthase		EHUX26a
		E1516HUX11a
		E371HUX09a
Glutaredoxin (putative)	EHUX130k74a
Glyceraldehyde-3-phosphate dehydrogenase		EHUX12b
Glyceraldehyde-3-phosphate dehydrogenase (chloroplastic) *	EHUX130k04a	EHUX12a
Glycerol-3-phosphate dehydrogenase	EHUX130k45a, 45b
Heat shock protein 60		EHUX27a
		E1516HUX32a
Heat shock protein 70 *	EHUX130k70a	EHUX01a, 01b, 01c
		E1516HUX01a, 01b, 01c, 10a, 10b, 10c, 10d
		E371HUX01a, 01b
Heat shock protein 90		EHUX03a, 08a, 08b, 08c
		E1516HUX04a, 04b, 04c, 04d, 04e
		E371HUX03a, 03b, 03c
High mobility group protein		E1516HUX21a
Histone H2A *	EHUX130k87a	EHUX39a, 39b, 39c
		E371HUX35a, 35b, 35c
Histone H2B *	EHUX130k89a	EHUX35a, 35b
		E371HUX31a
Histone H4 *	EHUX130k92a	EHUX38a
		E371EHUX30a, 30b, 30c
Inorganic pyrophosphatase		EHUX37a
Isocitrate dehydrogenase		E1516HUX34a
Long-chain fatty acid CoA synthetase		E1516HUX33a
Malonyl-CoA:ACP transacylase		E1516HUX35a
MC family transporter		EHUX07a, 07b
Methionine synthase		E1516HUX15a, 15b; 37a
NAD-dependent epimerase/dehydratase	EHUX130k61a
Nascent polypeptide-associated complex protein/transcription factor (putative)	EHUX130k52a
No BLAST hit	EHUX130k03a, 08a, 08b
No BLAST hit	EHUX130k05a, 05b
No BLAST hit	EHUX130k10a
No BLAST hit	EHUX130k13a, 13b
No BLAST hit	EHUX130k16a
No BLAST hit	EHUX130k17a
No BLAST hit	EHUX130k20a
No BLAST hit	EHUX130k23a
No BLAST hit	EHUX130k24a
No BLAST hit	EHUX130k25a
No BLAST hit	EHUX130k27c
No BLAST hit	EHUX130k31a
No BLAST hit	EHUX130k31b
No BLAST hit	EHUX130k36a
No BLAST hit	EHUX130k37a
No BLAST hit	EHUX130k39a
No BLAST hit	EHUX130k40a
No BLAST hit	EHUX130k46a
No BLAST hit	EHUX130k47a
No BLAST hit	EHUX130k48a
No BLAST hit	EHUX130k49a
No BLAST hit	EHUX130k53a
No BLAST hit	EHUX130k54a
No BLAST hit	EHUX130k55a
No BLAST hit	EHUX130k56a
No BLAST hit	EHUX130k57a
No BLAST hit	EHUX130k58a
No BLAST hit	EHUX130k59a
No BLAST hit	EHUX130k60a
No BLAST hit	EHUX130k63a
No BLAST hit	EHUX130k64a
No BLAST hit	EHUX130k66a
No BLAST hit	EHUX130k67a
No BLAST hit	EHUX130k76a
No BLAST hit	EHUX130k78a
No BLAST hit	EHUX130k83a
PDZ domain containing protein (putative)	EHUX130k19a
Peptidyl-prolyl cis-trans isomerase *	EHUX130k73a, 75a	E371HUX25a, 25b
Peroxiredoxin Q	EHUX130k68a
Phosphoglycerate kinase *	EHUX130k11a, 11b, 11c	EHUX13a
Phosphoribosylamine-glycine ligase		E1516HUX23a
Phosphoribulokinase (chloroplastic) *	EHUX130k14a	EHUX05a, 05b, 05c, 05d
Photosystem II 12 kDa extrinsic protein (chloroplastic)	EHUX130k12f
Photosystem II stability/assembly factor HCF135		EHUX40a
Photosystem II oxygen evolving enhancer protein (chloroplastic) *	EHUX130k27a, 27b, 34a	E371HUX27a
Polyketide synthase		E1516HUX27a
Precursor of pyruvate dehydrogenase E1 alpha		E1516HUX25a
		E371HUX22a
Predicted protein	EHUX130k02a
Predicted protein *	EHUX130k21a, 21b, 21c	EHUX31a
Predicted protein	EHUX130k65a, 65b
Predicted protein	EHUX130k72a
Predicted protein	EHUX130k79a
Predicted protein	EHUX130k82a
Predicted protein	EHUX130k84a
Protein containing Ig-like fold (putative)		E1516HUX24a
Protein translocase subunit secA		E1516EHUX26a
Pyruvate carboxylase		E1516HUX19c
		E371HUX02a
Ribose 5-phosphate isomerase		EHUX34a
Ribosomal protein rpS22	EHUX130k62a
Ribulose-phosphate 3-epimerase	EHUX130k30a, 30b
S-adenosylmethionine synthetase *	EHUX130k06a, 06b, 06c	EHUX17a, 17b, 30a, 30b
Serine hydroxylmethyltransferase		EHUX18a, 18b
Splicing factor 3B		E371HUX19a
Thioredoxin	EHUX130k71a
Transkelotase		EHUX15a, 15b, 15c, 15d, 15e
		E1516HUX22a, 22b, 22c
		E371HUX15a
Translational activator		E371HUX05a, 05b
Translocator of the inner chloroplast envelope membrane 110k		E1516HUX05a
		E371HUX10a
Ubiquitin family protein	EHUX130k01a, 01b, 01c, 01d, 01e, 01f
Uncharacterised protein 1		E371HUX07a
Uncharacterised protein 2		E1516HUX08a, 08b
Uncharacterised protein 3b		EHUX31b
Unknown protein (No BLAST hit) 1		EHUX11a, 11b, 11c, 11d
Unknown protein (No BLAST hit) 2		EHUX33a
Unknown protein (No BLAST hit) 3		EHUX09a
Unknown protein (No BLAST hit) 4		E1516HUX06a
Unknown protein (No BLAST hit) 6		E371HUX21a
All IDs are based on ≥2 peptides.
Peptide numbers for CO2 experiment EST IDs can be found in "BUDAPEST output" worksheet
Peptide numbers for EST IDs from Jones et al (2011) Mar Biotechnol paper can be found in supplementary information available at: http://www.springerlink.com/content/f4v1625212384460/10126_2010_Article_9320_ESM.html
Redundancy between the two datasets has been determined by nomenclature and by alignment and/or phylogeny in the instances of no BLAST/predicted proteins

## Sheet: All CO2 and Mar Bio proteins
Protein identification	CO2 identifier	Mar Bio (2011) identifier	Notes					Green and star = both datasets
2-oxogluterate dehydrogenase E1 component		E1516HUX29a						Red = CO2
30S ribosomal protein S7 (chloroplastic) *	Q4G343	Q4G343						Black = Mar Bio
3R-hydroxyacyl-ACP dehydratase		E1516HUX36a
		E371HUX26a
40S ribosomal protein S11	EHUXJGI108665
40S ribosomal protein S12	EHUX130k81a
	EHUXJGI240824
40S ribosomal protein S16		E371HUX36a
40S ribosomal protein S19		E371HUX33a
40S ribosomal protein S21	EHUX130k94a
50S ribosomal protein L1 (chloroplastic)	EHUX130k42a, 42b
	EHUXJGI72905
50S ribosomal protein L12 (chloroplastic)	EHUX130k86a
	EHUXJGI86748
50S ribosomal protein L14 (chloroplastic)	C7BEX8, D0VMV8, D8UMU9, B8R194, P11094, P56363
50S ribosomal protein L17 (chloroplastic)	EHUX130k80a
50S ribosomal protein L29 (chloroplastic)	EHUX130k88a
50S ribosomal protein L4		E371HUX20a
50S ribosomal protein L9 (chloroplastic)	EHUX130k77a
60S acidic ribosomal protein P2	EHUX130k90a
60S ribosomal protein L10		E371HUX32a
60S ribosomal protein L18		E371HUX28a
60S ribosomal protein L23a *	EHUX130k85a	E371HUX34a
60S ribosomal protein L6		E371HUX29a
Acetyl-CoA carboxylase		B6KQ38
		EHUX06a
		E1516HUX07a, 07b, 07c, 07d, 07e, 07f, 19a, 19b
		E371HUX08a, 08b, 08c, 08d, 08e
Actin		Q41205
		EHUX16a, 16b, 16c
		E1516HUX13a, 13b, 13c, 13d, 13e, 13f
Acyl carrier protein	EHUX130k97a
Adenosylhomocysteinase	EHUX130k26a
	EHUXJGI271331
Adenylate kinase (putative)	EHUX130k33a
	EHUXJGI284516
ADP-ribosylation factor		A3FQ99
		EHUX36a
		E371HUX23a, 23b
Ankyrin repeat protein (putative)	EHUX130k51a
Apocytochrome f	Q4G3D7
	EHUX130k35a
ATP ase/synthase (vacuolar)	EHUX130k91a
	EHUXJGI210241
ATP synthase F(0) sector subunit b (chloroplastic)		Q4G399
ATP synthase F(0) sector subunit b' (chloroplastic) *	Q4G3A0	Q4G3A0
ATP synthase F(1) sector subunit alpha (chloroplastic) *	C7BEK1, Q4G397	Q4G397
ATP synthase F(1) sector subunit beta (chloroplastic) *	Q4G3C8	Q4G3C8
ATP synthase F(1) sector subunit delta (chloroplastic)		Q4G398
ATP synthase F(1) sector subunit epsilon (chloroplastic)	Q4G3C9
ATP synthase subunit alpha *	EHUX130k07a	EHUX04c
	EHUXJGI199000
ATP synthase subunit beta		B6KBY3, Q4YUP6
		EHUX04a
ATP synthase subunit gamma *	EHUX130k15a, 15b, EHUXJGI197716	EHUX14a
ATP synthase, subunit gamma (chloroplastic)		EHUX14b
ATP ase/synthase, vacuolar, subunit a		Q4YUW5, Q4XX14, B6KAW0, Q5CEQ9
		EHUX04b
		E1516HUX 14a, 14b
ATP ase/synthase, vacuolar, subunit b	EHUX130k07b
ATP ase/synthase, vacuolar, subunit e		EHUX32a
		E371HUX24a
ATP-sulfurylase	EHUX130k32a
Beta adaptin		E1516HUX28a
Carbamoyl phosphate synthetase		E371HUX14a, 16a
Carbonic anhydrase		EHUX29a
Cell division cycle protein 48		Q1JSD1, A0DVN2, Q4N783, Q5CKA3
		E1516HUX02a, 02b
		E371HUX 06a
Chaperonin 10	EHUX130k93a
Chloroplast light harvesting protein *	EHUX130k12a, 12b, 12c, 12d, 12e, 69a	EHUX23a, 23b, 23c, 23d, 23e, 23f, 23g, 23h, 23i, 23j, 23k, 23l
		E371HUX12a, 12b, 12c, 12d, 12e, 12f, 12g, 12h, 12i, 12j
Chloroplast O-acetyl serine lyase *	Q2IA80	Q2IA80
	EHUX130k22a, 22b	EHUX19a, 19b, 19c
	EHUXJGI67090
Clathrin heavy chain		B7G4Y3
		EHUX20a
		E1516HUX12a, 17a, 20a
		E371HUX11a, 11b, 13a
Clathrin light chain (putative)	EHUX130k18a
Clp protease adaptor protein	EHUX130k95a
Clp protease ATP binding protein *	Q4G3D0	Q4G3D0, A6MVP5, O78410
Cold shock DNA-binding protein (putative)	EHUX130k96a
	EHUXJGI111020
Cytochrome c550		Q4G368
Delta-aminolevulinic acid dehydratase	EHUX130k28a
Demethylmenaquinone methyltransferase/aldoase (putative)	EHUX130k09a
Elongation factor 1 alpha like protein		Q5UHI6, Q195D8, Q195E0, A8I1V6
		EHUX02a
		E1516HUX03a, 03b
Elongation factor 2		E1516HUX03c, 16b, 16c
		E371HUX04a
Elongation factor 3-related protein		E1516HUX18a, 30a
		E371HUX05c, 05d, 05e
Elongation factor G		E1516HUX16a
Elongation factor Ts (chloroplastic)	EHUX130k43a
	EHUXJGI69868
Elongation factor Tu		Q4G342
Enolase		E1516HUX31a
Enoyl-acyl carrier reductase		EHUX25a
Enoyl-CoA hydratase		E371HUX18a
ETC complex I protein (putative)	EHUX130k41a, 44a
Ferredoxin NADP+ reductase *	EHUX130k29a	EHUX10a, 10b
FKBP-type peptidyl-prolyl cis-trans isomerase	EHUX130k50a, 50b
	EHUXJGI239227
Fructose-bisphosphate aldolase		EHUX21a, 24a
Gbp1p telomere-binding protein (putative)	EHUX130k38a
	EHUXJGI68475
GDP-mannose 3,5-epimerase		EHUX22a, 22b
Gelosin/severin like		E371HUX17a
Glucose-6-phosphate isomerase		A5XB27
		E1516HUX09a, 09b
Glutamate 1-semialdehyde aminomutase		EHUX28a
Glutamine synthase		EHUX26a
		E1516HUX11a
		E371HUX09a
Glutaredoxin (putative)	EHUX130k74a
Glyceraldehyde-3-phosphate dehydrogenase (chloroplastic) *	Q2IA54, Q2IA55, Q5R254, Q5R258	Q2IA54
	EHUX130k04a	EHUX12a
Glyceraldehyde-3-phosphate dehydrogenase *	Q6WEV8, Q6WEV4	EHUX12b
	EHUXJGI203425
Glycerol-3-phosphate dehydrogenase	EHUX130k45a, 45b
	EHUXJGI87542
Glyoxalase		B6KIA0
GrpE-like protein	EHUXJGI274290
Heat shock protein 60		A1DRE2
		EHUX27a
		E1516HUX32a
Heat shock protein 70 *	EHUX130k70a	Q4G366, A5YVT5, B3VMZ7, Q7DM14, Q7Z1E0, Q8IB24, Q9LU13, Q9NHB4,A0SHR9, Q24768, TPSJGI269120, Q4N3K7
		Q0GFF0, Q0WY81, Q234I5, Q4G366, P90655, A3E4D1, B7FQ84, P16394, Q15GB8, Q27146, Q7DM14, Q84KP8, O61006
		EHUX01a, 01b, 01c
		E1516HUX01a, 01b, 01c, 10a, 10b, 10c, 10d
		E371HUX01a, 01b
Heat shock protein 90		Q5DK81, Q5DK79, A7XG11, Q9Y0T0
		EHUX03a, 08a, 08b, 08c
		E1516HUX04a, 04b, 04c, 04d, 04e
		E371HUX03a, 03b, 03c
High mobility group protein		E1516HUX21a
Histone demethylase/ Jumonji, PHD finger, ARID domain containing protein	EHUXJGI95074
Histone H1	EHUXJGI369218
Histone H2A *	D0MWJ7	Q49JJ1, Q49JJ2
	EHUX130k87a	EHUX39a, 39b, 39c
	EHUXJGI72235	E371HUX35a, 35b, 35c
Histone H2B *	Q00Y53, C1MHL2, A4S1C9, D8LWN1, D8MAP9, Q013K3	EHUX35a, 35b
	EHUX130k89a	E371HUX31a
	EHUXJGI96192
Histone H3		B6KRZ1, Q5CQU9
Histone H4 *	C1MUM2, A4RS62, P82888, Q43083	P82888
	EHUX130k92a	EHUX38a
	EHUXJGI201707, EHUXJGI255477	E371HUX30a, 30b, 30c
Inorganic pyrophosphatase		EHUX37a
Isochorismate synthase/peptidyl-prolyl cis-trans isomerase (putative)	EHUXJGI266886
Isocitrate dehydrogenase		E1516HUX34a
Long-chain fatty acid CoA synthetase		E1516HUX33a
Malonyl-CoA:ACP transacylase		E1516HUX35a
MC family transporter		EHUX07a, 07b
Methionine synthase		E1516HUX15a, 15b; 37a
Mucin-associated surface protein (MASP)	EHUXJGI270658
NAD-dependent epimerase/dehydratase	EHUX130k61a
Nascent polypeptide-associated complex protein/transcription factor (putative)	EHUX130k52a
No BLAST hit	EHUX130k05a, 05b
No BLAST hit	EHUX130k10a
No BLAST hit	EHUX130k13a, 13b
	EHUXJGI205571
No BLAST hit	EHUX130k16a
No BLAST hit	EHUX130k17a
No BLAST hit	EHUX130k20a
No BLAST hit	EHUX130k23a
No BLAST hit	EHUX130k24a
No BLAST hit	EHUX130k25a
No BLAST hit	EHUX130k27c
No BLAST hit	EHUX130k31a
No BLAST hit	EHUX130k31b
No BLAST hit	EHUX130k36a
No BLAST hit	EHUX130k37a
No BLAST hit	EHUX130k39a
No BLAST hit	EHUX130k40a
No BLAST hit	EHUX130k46a
No BLAST hit	EHUX130k47a
No BLAST hit	EHUX130k48a
No BLAST hit	EHUX130k49a
No BLAST hit	EHUX130k53a
No BLAST hit	EHUX130k54a
No BLAST hit	EHUX130k55a
No BLAST hit	EHUX130k56a
No BLAST hit	EHUX130k57a
No BLAST hit	EHUX130k58a
No BLAST hit	EHUX130k59a
No BLAST hit	EHUX130k60a
No BLAST hit	EHUX130k63a
No BLAST hit	EHUX130k64a
No BLAST hit	EHUX130k66a
	EHUXJGI218259
No BLAST hit	EHUX130k67a
No BLAST hit	EHUX130k76a
	EHUXJGI237243
No BLAST hit	EHUX130k78a
No BLAST hit	EHUX130k83a
	EHUXJGI110219
No BLAST hit 1*	EHUX130k03a, 08a, 08b	EHUX11a, 11b, 11c, 11d
	EHUXJGI349877
No BLAST hit 2		EHUX33a
No BLAST hit 3		EHUX09a
No BLAST hit 4		E1516HUX06a
No BLAST hit 6		E371HUX21a
PDZ domain containing protein (putative)	EHUX130k19a, EHUXJGI269934
Peptidyl-prolyl cis-trans isomerase *	EHUX130k73a, 75a	TPSJGI31535
		E371HUX25a, 25b
Peroxiredoxin Q	EHUX130k68a
Phopshoribulokinase (chloroplastic) *	EHUX130k14a	EHUX05a, 05b, 05c, 05d
	EHUXJGI61858
Phosphoglycerate kinase *	Q5ENR8	Q5ENR8
	EHUX130k11a, 11b, 11c	EHUX13a
	EHUXJGI270670, EHUXJGI109236
Phospholipid-transporting ATPase	A8IVJ3
Phosphoribosylamine-glycine ligase		E1516HUX23a
Photosystem II 12 kDa extrinsic protein (chloroplastic)	EHUX130k12f
Photosystem II CP43 apoprotein		Q4G396	In Mar Biotechnol (2011) paper, Q4G396 was termed "photosystem II 44kDa protein"
Photosystem II CP47 apoprotein		Q2WEE8, A6MW31, A0T0B2
Photosystem II D2 protein		Q4G395
Photosystem II stability/assembly factor HCF135		EHUX40a
Photosystem II oxygen evolving enhancer protein (chloroplastic) *	EHUX130k27a, 27b, 34a	E371HUX27a	In Mar Biotechnol (2011) paper, E371HUX27a was termed "unknown protein (No BLAST hit) 7"
	EHUXJGI265795
Periplasmic binding/iron transport lipoprotein (putative)	EHUXJGI269712
Polyketide synthase		E1516HUX27a
Precursor of pyruvate dehydrogenase E1 alpha		E1516HUX25a
		E371HUX22a
Predicted (uncharacterised) protein 1		E371HUX07a
Predicted (uncharacterised) protein 2		E1516HUX08a, 08b
Predicted (uncharacterised) protein 3b		EHUX31b
Predicted protein	EHUX130k02a
Predicted protein *	EHUX130k21a, 21b, 21c	EHUX31a
Predicted protein	EHUX130k65a, 65b
Predicted protein	EHUX130k72a
Predicted protein	EHUX130k79a
Predicted protein	EHUX130k82a
Predicted protein	EHUX130k84a
	EHUXJGI243179, EHUXJGI96453
Predicted protein 1	Q00Z00
Predicted protein 2	B7G1C9
Protein containing Ig-like fold (putative)		E1516HUX24a	In Mar Biotechnol (2011) paper, this was termed "Unknown protein (No BLAST hit) 5"
Protein translocase subunit secA		E1516EHUX26a
Pyruvate carboxylase		B9X0T8
		E1516HUX19c
		E371HUX02a
Ribose 5-phosphate isomerase		EHUX34a
Ribosomal protein rpS22	EHUX130k62a
Ribulose bisphosphate carboxylase large chain *	Q4G3F4, Q33482, A7UM67, P24624, Q32632	Q4G3F4, A6MVT9, A9UK32, Q2KK15, Q2KK34, Q32295, Q32316, Q32331, Q33483, Q760T1, Q8MAA4, Q8MAA5, Q95AK9
Ribulose bisphosphate carboxylase small chain *	Q4G3F3	Q4G3F3, O98948
Ribulose-phosphate 3-epimerase	EHUX130k30a, 30b
Rubisco expression protein		Q4G379
S-adenosylmethionine synthetase *	B8BY55, B9ZZX7, TPSJGI21815	EHUX17a, 17b, 30a, 30b
	EHUX130k06a, 06b, 06c
	EHUXJGI62235, EHUXJGI267646
Serine hydroxylmethyltransferase		EHUX18a, 18b
Splicing factor 3B		E371HUX19a
Splicing factor Prp8		B6KJP5, B7FXZ2, Q23FT4, Q962X1, Q9AW36
Thioredoxin	EHUX130k71a
Transkelotase		EHUX15a, 15b, 15c, 15d, 15e
		E1516HUX22a, 22b, 22c
		E371HUX15a
Translational activator		E371HUX05a, 05b
Translocator of the inner chloroplast envelope membrane 110k		E1516HUX05a
		E371HUX10a
Ubiquitin family protein	EHUX130k01a, 01b, 01c, 01d, 01e, 01f

[truncated: 3 more sheets: UniProtKB MASCOT, JGI Ehux MASCOT, EST MASCOT]
